# Supplementary material for: Synthesis of 6″-Modified Kanamycin A Derivatives and Evaluation of Their Antibacterial Properties
Source: MDPI journal article supplement (doi:10.3390/pharmaceutics15041177), 2023-04-07
Supplement: s1 [file s1]

## SUPPORTING INFORMATION

### Synthesis of 6''-modified kanamycin A derivatives and evaluation of their antibacterial properties

Shapovalova K.S.<sup>1</sup>, Zatonsky G.V.<sup>1</sup>, Grammatikova N.E.<sup>1</sup>, Osterman I.A.<sup>2,3</sup>,  
Razumova E.A.<sup>4</sup>, Shchekotikhin A.E.<sup>1</sup>, Tevyashova A.N.<sup>1\*</sup>

<sup>1</sup>Gause Institute of New Antibiotics, 11 B. Pirogovskaya, 119021, Moscow, Russia

<sup>2</sup>Center of Life Sciences, Skolkovo Institute of Science and Technology, Bolshoy Boulevard 30, bld. 1, 121205, Moscow, Russia

<sup>3</sup>Center for Translational Medicine, Sirius University of Science and Technology, Olympic Avenue 1, 354340 Sochi, Russia.

<sup>4</sup>Department of Chemistry, Lomonosov Moscow State University, Leninskie Gory 1, 119991, Moscow, Russia

#### LIST OF CONTENTS:

|                                                                                                                                                                              |         |
|------------------------------------------------------------------------------------------------------------------------------------------------------------------------------|---------|
| <b>Table S1.</b> Assignments of the signals in <sup>1</sup> H and <sup>13</sup> C NMR spectra of compounds <b>4–11</b> .....                                                 | S2-S3   |
| <b>Figures S1-S2.</b> <sup>1</sup> H and <sup>13</sup> C NMR spectra of 1,3,6',3''-tetra-N-Cbz-kanamycin A                                                                   | S4-S5   |
| <b>Figures S3-S4.</b> <sup>1</sup> H and <sup>13</sup> C NMR spectra of 1,3,6',3''-tetra-N-Boc-kanamycin A                                                                   | S6-S7   |
| <b>Figure S5-S6.</b> <sup>1</sup> H and <sup>13</sup> C NMR spectra of 1,3,6',3''-tetra-N-Cbz-6''-O-(2,4,6-triisopropylbenzenesulfonyl)kanamycin A ( <b>2</b> )              | S8-S9   |
| <b>Figures S7-S28.</b> <sup>1</sup> H and <sup>13</sup> C NMR spectra of the kanamycin A derivatives <b>4a</b> , <b>4–7</b> , <b>8a</b> , <b>8</b> , <b>9a</b> , <b>9–11</b> | S10-S31 |
| <b>Figure S29.</b> Fragment of the HMBC <sup>1</sup> H- <sup>13</sup> C spectrum of compound <b>12</b>                                                                       | S32     |
| <b>Figure S30.</b> <sup>1</sup> H- <sup>15</sup> N edHSQC spectrum of compound <b>12</b>                                                                                     | S33     |
| <b>Figure S31.</b> The antibacterial activity of the kanamycin A derivatives <b>4</b> , <b>6–11</b> and reference antibiotics                                                | S34     |

**Table S1.** Assignments of the signals in  $^1\text{H}$  and  $^{13}\text{C}$  NMR spectra of compounds **4–11**.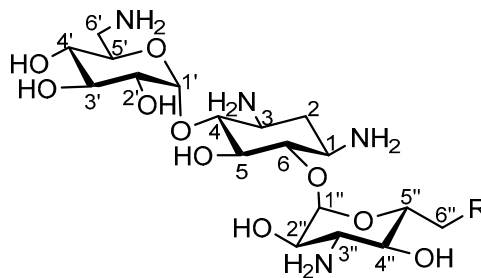

| Atom | Compound, $^{13}\text{C}/^1\text{H}$ |           |           |           |           |           |           |           |
|------|--------------------------------------|-----------|-----------|-----------|-----------|-----------|-----------|-----------|
|      | 4                                    | 5         | 6         | 7         | 8         | 9         | 10        | 11        |
| 1'   | 101.7                                | 103.5     | 101.5     | 102.3     | 101.7     | 101.9     | 101.8     | 102.0     |
|      | 5.70                                 | 5.09      | 5.61      | 5.47      | 5.66      | 5.51      | 5.51      | 5.55      |
| 2'   | 74.0                                 | 71.0      | 74.0      | 74.2      | 73.9      | 74.2      | 74.4      | 74.1      |
|      | 3.67                                 | 3.96      | 3.65      | 3.68      | 3.73      | 3.66      | 3.64      | 3.68      |
| 3'   | 74.9                                 | 74.8      | 75.0      | 75.1      | 74.9      | 75.1      | 75.4      | 74.9      |
|      | 3.80                                 | 3.75      | 3.83      | 3.78      | 3.84      | 3.77      | 3.78      | 3.78      |
| 4'   | 73.9                                 | 74.1      | 73.5      | 73.8      | 73.6      | 73.8      | 73.9      | 73.7      |
|      | 3.39                                 | 3.37      | 3.45      | 3.41      | 3.46      | 3.39      | 3.93      | 3.40      |
| 5'   | 71.7                                 | 71.8      | 71.5      | 71.6      | 71.6      | 71.6      | 72.6      | 71.6      |
|      | 4.00                                 | 3.91      | 4.08      | 4.04      | 4.07      | 4.03      | 4.01      | 4.02      |
| 6'   | 43.4                                 | 43.5      | 43.2      | 43.2      | 43.2      | 43.2      | 43.6      | 43.1      |
|      | 3.48/3.22                            | 3.44/3.19 | 3.50/3.28 | 3.43/3.23 | 3.49/3.30 | 3.42/3.21 | 3.34/3.12 | 3.44/3.24 |
| 1    | 51.6                                 | 51.5      | 51.4      | 51.7      | 51.5      | 51.6      | 51.8      | 51.4      |
|      | 3.37                                 | 3.42      | 3.31      | 3.12      | 3.40      | 3.12      | 3.02      | 3.32      |
| 2    | 32.0                                 | 30.5      | 33.3      | 34.7      | 32.4      | 34.8      | 37.1      | 32.6      |
|      | 2.44/1.92                            | 2.47/1.96 | 2.39/1.74 | 2.25/1.56 | 2.46/1.85 | 2.22/1.54 | 2.10/1.39 | 2.40/1.75 |
| 3    | 53.1                                 | 53.1      | 53.2      | 53.5      | 53.2      | 53.5      | 57.3      | 53.2      |
|      | 3.51                                 | 3.50      | 3.50      | 3.34      | 3.55      | 3.31      | 3.14      | 3.49      |
| 4    | 86.8                                 | 81.4      | 87.5      | 87.9      | 87.0      | 88.0      | 89.5      | 87.2      |
|      | 3.78                                 | 3.79      | 3.71      | 3.61      | 3.83      | 3.58      | 3.42      | 3.73      |
| 5    | 77.7                                 | 76.8      | 76.9      | 77.2      | 77.1      | 77.1      | 77.2      | 74.4      |
|      | 3.84                                 | 3.52      | 3.88      | 3.78      | 3.89      | 3.78      | 3.74      | 3.51      |
| 6    | 83.2                                 | 86.2      | 85.0      | 87.3      | 84.4      | 86.9      | 88.3      | 85.0      |
|      | 3.89                                 | 3.70      | 3.72      | 3.54      | 3.83      | 3.53      | 3.44      | 3.72      |
| 1''  | 103.2                                | 101.2     | 103.2     | 103.1     | 103.1     | 103.1     | 102.9     | 103.2     |
|      | 5.21                                 | 5.41      | 5.16      | 5.11      | 5.22      | 5.10      | 5.11      | 5.13      |
| 2''  | 71.1                                 | 69.9      | 71.4      | 72.1      | 71.1      | 72.2      | 73.9      | 71.1      |
|      | 3.99                                 | 3.63      | 3.97      | 3.84      | 4.03      | 3.82      | 3.66      | 3.95      |
| 3''  | 57.4                                 | 57.7      | 57.8      | 57.5      | 57.6      | 57.5      | 57.6      | 57.6      |
|      | 3.55                                 | 3.56      | 3.51      | 3.36      | 3.57      | 3.33      | 3.57      | 3.50      |
| 4''  | 70.7                                 | 73.9      | 70.5      | 71.4      | 70.4      | 71.6      | 73.6      | 70.3      |
|      | 3.60                                 | 3.66      | 3.65      | 3.50      | 3.68      | 3.47      | 3.32      | 3.61      |
| 5''  | 69.9                                 | 73.9      | 73.7      | 71.9      | 71.0      | 72.2      | 72.6      | 71.9      |
|      | 4.34                                 | 4.36      | 4.08      | 4.13      | 4.29      | 4.10      | 4.04      | 4.15      |
| 6''  | 60.3                                 | 64.4      | 51.3      | 51.3      | 50.8      | 51.3      | 51.7      | 51.3      |
|      | 3.53/3.32                            | 5.04/4.77 | 3.13/2.95 | 3.33/3.12 | 3.60/3.35 | 3.27/3.06 | 3.09/2.87 | 3.39/3.17 |

| Introduced moiety                                                                  |           |       |      |      |      |           |                         |        |
|------------------------------------------------------------------------------------|-----------|-------|------|------|------|-----------|-------------------------|--------|
| 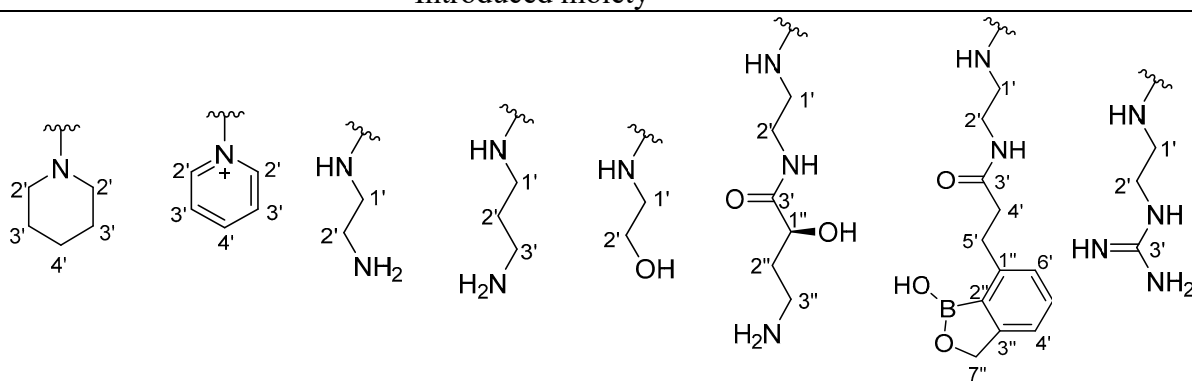 |           |       |      |      |      |           |                         |        |
| 1'                                                                                 |           |       | 48.6 | 48.3 | 52.6 | 50.3      | 40.3                    | 49.5   |
|                                                                                    |           |       | 3.07 | 3.07 | 3.34 | 3.08      | 3.36                    | 3.24   |
| 2'                                                                                 | 57.0      | 148.4 | 40.8 | 27.4 | 59.4 | 39.6      | 50.4                    | 41.1   |
|                                                                                    | 3.30/3.60 | 8.86  | 3.21 | 2.05 | 3.93 | 3.55/3.48 | 2.82                    | 3.56   |
| 3'                                                                                 | 25.5      | 131.0 |      | 39.8 |      | 179.0     | 179.9                   | 159.9  |
|                                                                                    |           |       |      |      |      | (C=O)     | (C=O)                   | (C=NH) |
|                                                                                    | 1.86      | 8.10  |      | 3.10 |      |           |                         |        |
| 4'                                                                                 | 23.9      | 149.3 |      |      |      |           | 33.3                    |        |
|                                                                                    | 1.67      | 8.61  |      |      |      |           | 3.10                    |        |
| 5'                                                                                 |           |       |      |      |      |           | 40.5                    |        |
|                                                                                    |           |       |      |      |      |           | 2.70                    |        |
| 1''                                                                                |           |       |      |      |      | 72.4      | 151.5                   |        |
|                                                                                    |           |       |      |      |      | 4.32      |                         |        |
| 2''                                                                                |           |       |      |      |      | 33.7      | 130.5                   |        |
|                                                                                    |           |       |      |      |      | 2.18/1.98 |                         |        |
| 3''                                                                                |           |       |      |      |      | 39.6      | 144.6                   |        |
|                                                                                    |           |       |      |      |      | 3.16      |                         |        |
| 4''                                                                                |           |       |      |      |      |           | 121.8                   |        |
|                                                                                    |           |       |      |      |      |           | 7.13,                   |        |
|                                                                                    |           |       |      |      |      |           | d, J=7.4                |        |
| 5''                                                                                |           |       |      |      |      |           | 130.4                   |        |
|                                                                                    |           |       |      |      |      |           | 7.28,                   |        |
|                                                                                    |           |       |      |      |      |           | t, J=7.3                |        |
| 6''                                                                                |           |       |      |      |      |           | 128.8                   |        |
|                                                                                    |           |       |      |      |      |           | 7.10,                   |        |
|                                                                                    |           |       |      |      |      |           | bd, J=7.0               |        |
| 7''                                                                                |           |       |      |      |      |           | 70.2                    |        |
|                                                                                    |           |       |      |      |      |           | 4.83                    |        |
|                                                                                    |           |       |      |      |      |           | 9.75 ( <sup>11</sup> B) |        |

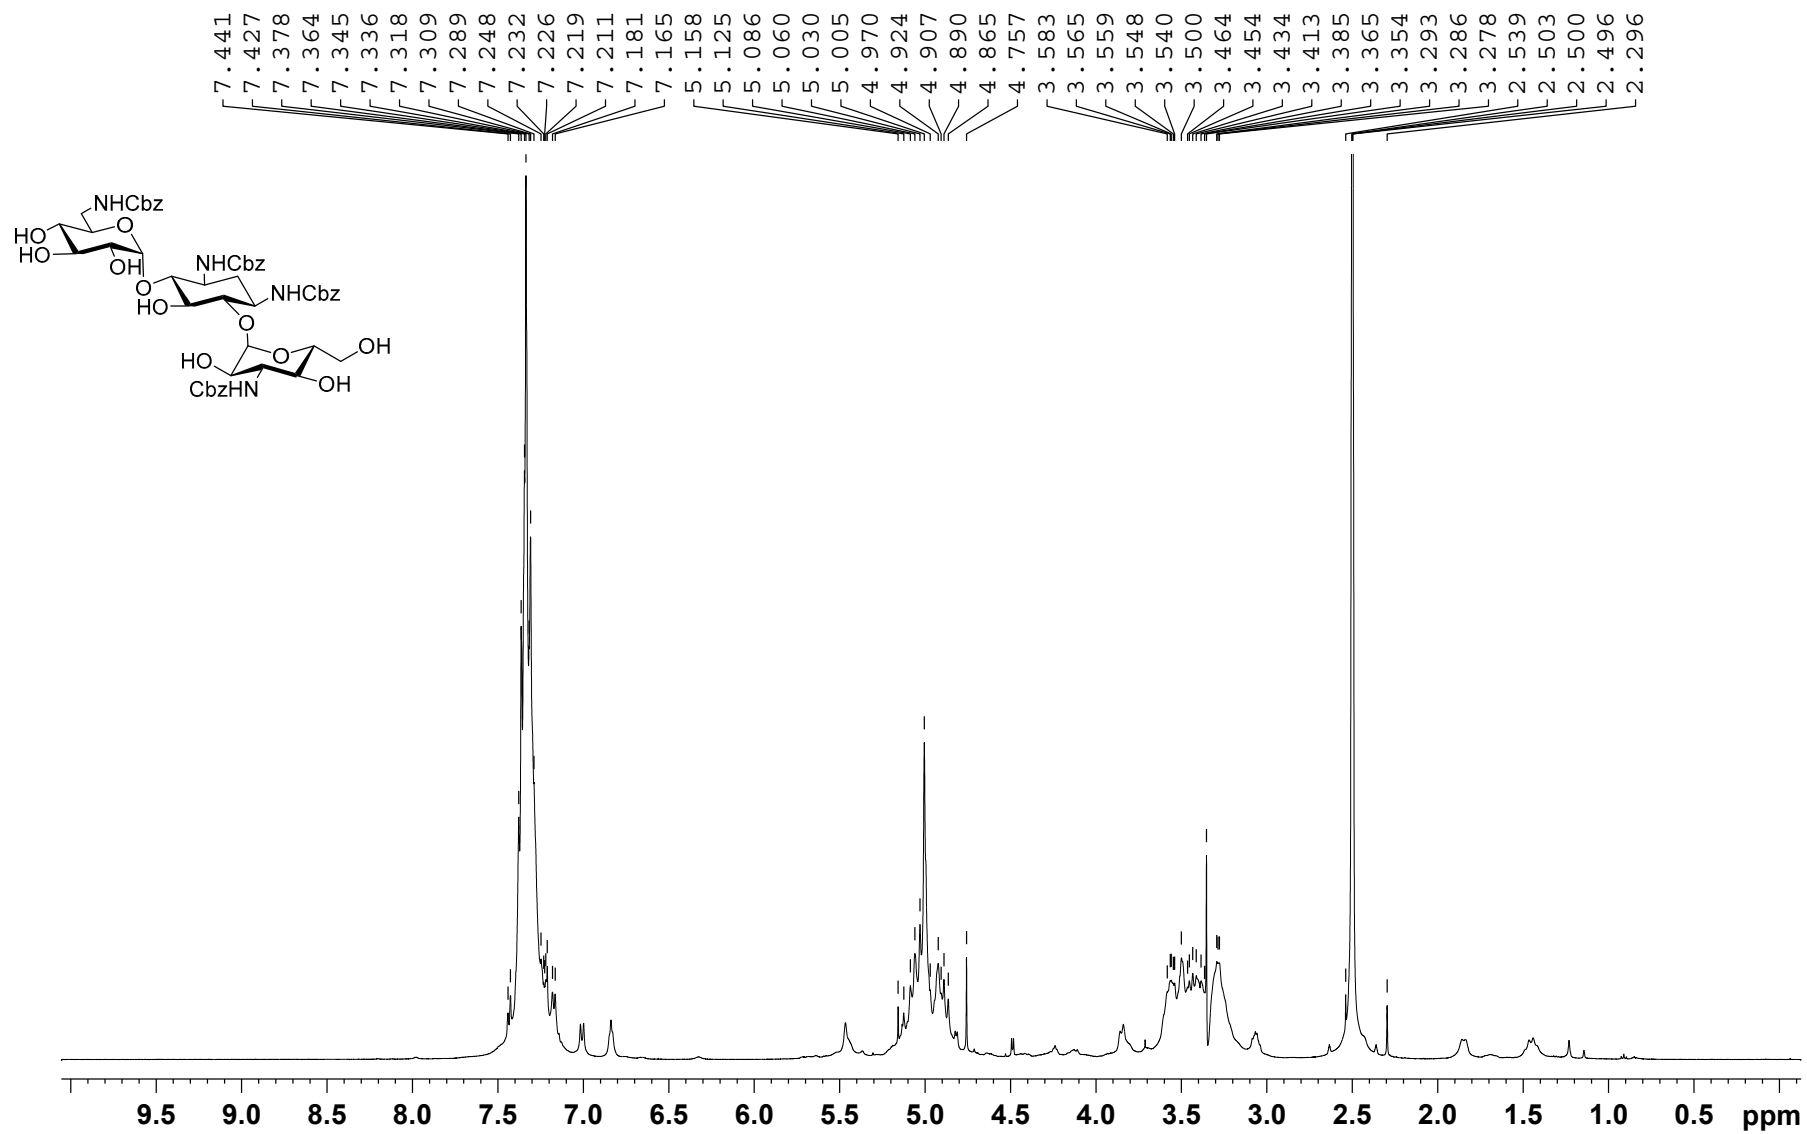

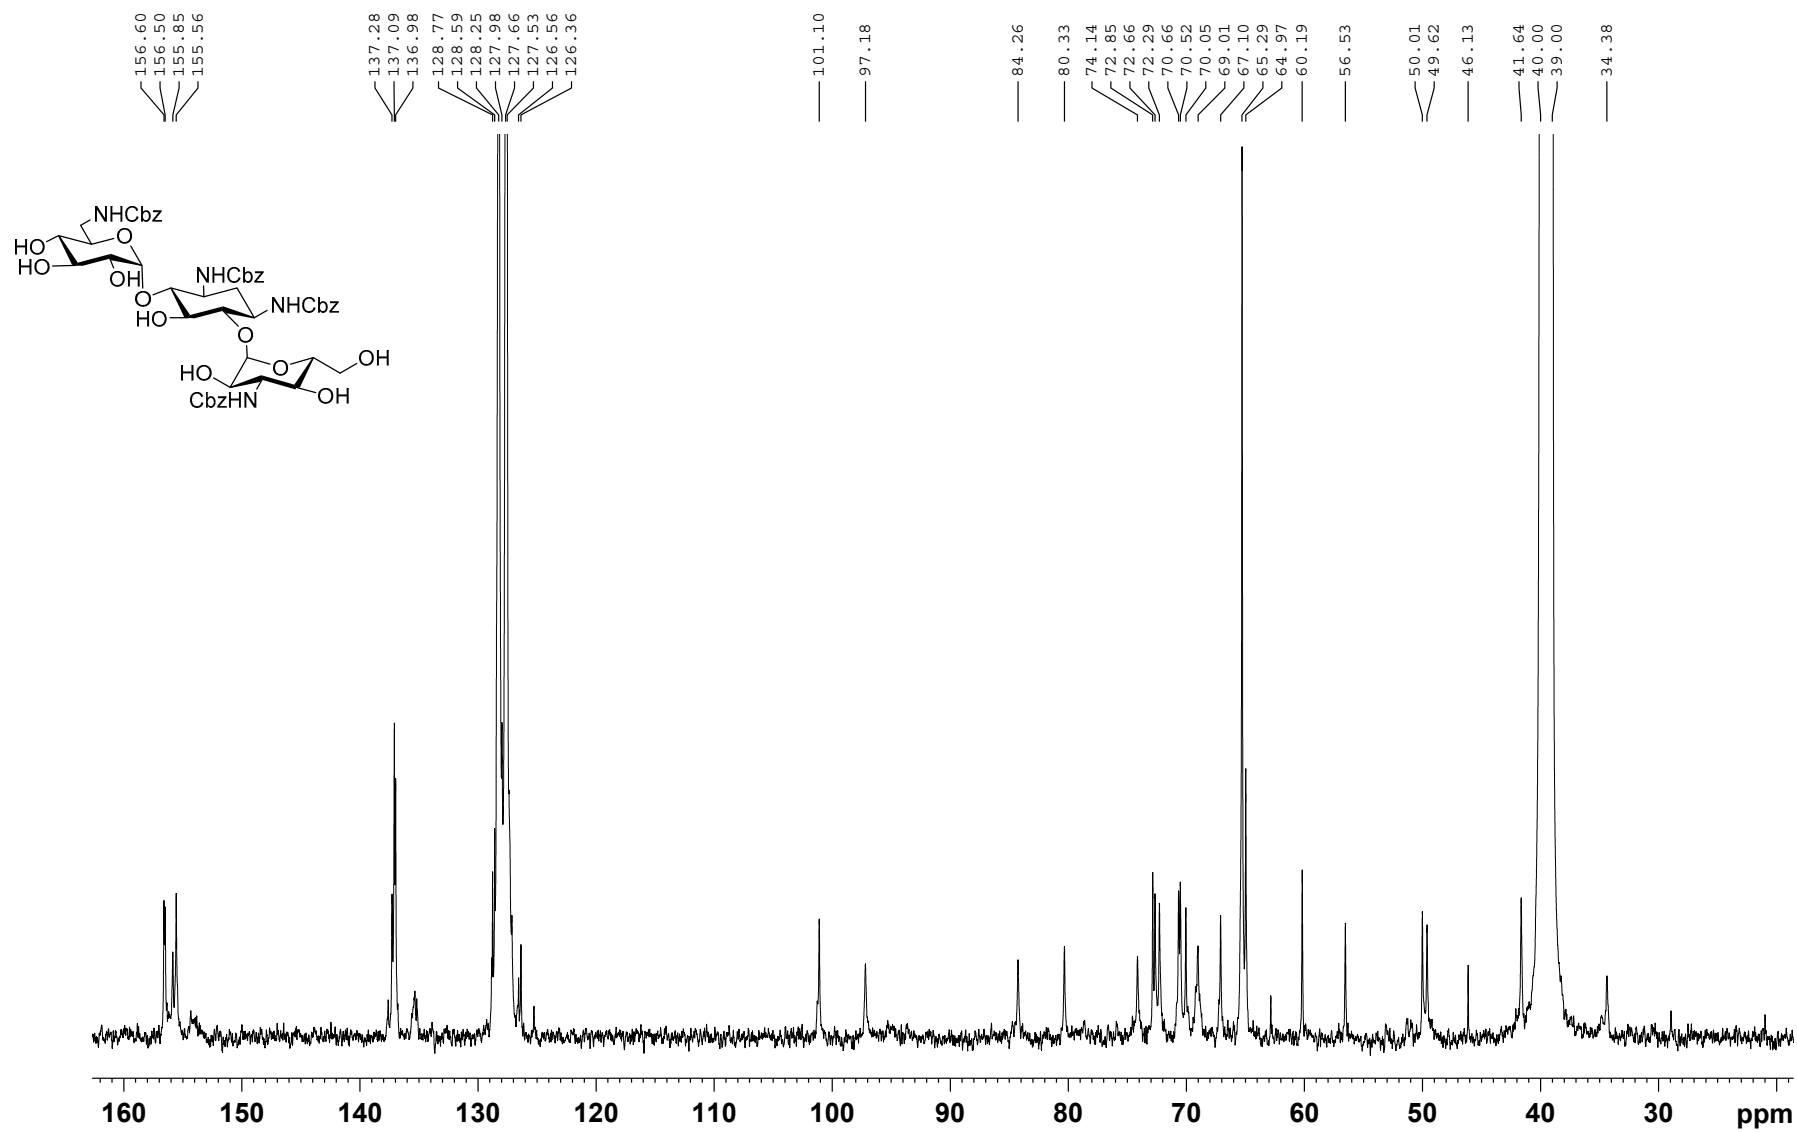

**Figure S2.**  $^{13}\text{C}$  NMR (125.8 MHz,  $d_6$ -DMSO) spectrum of 1,3,6',3''-tetra-N-Cbz-kanamycin A

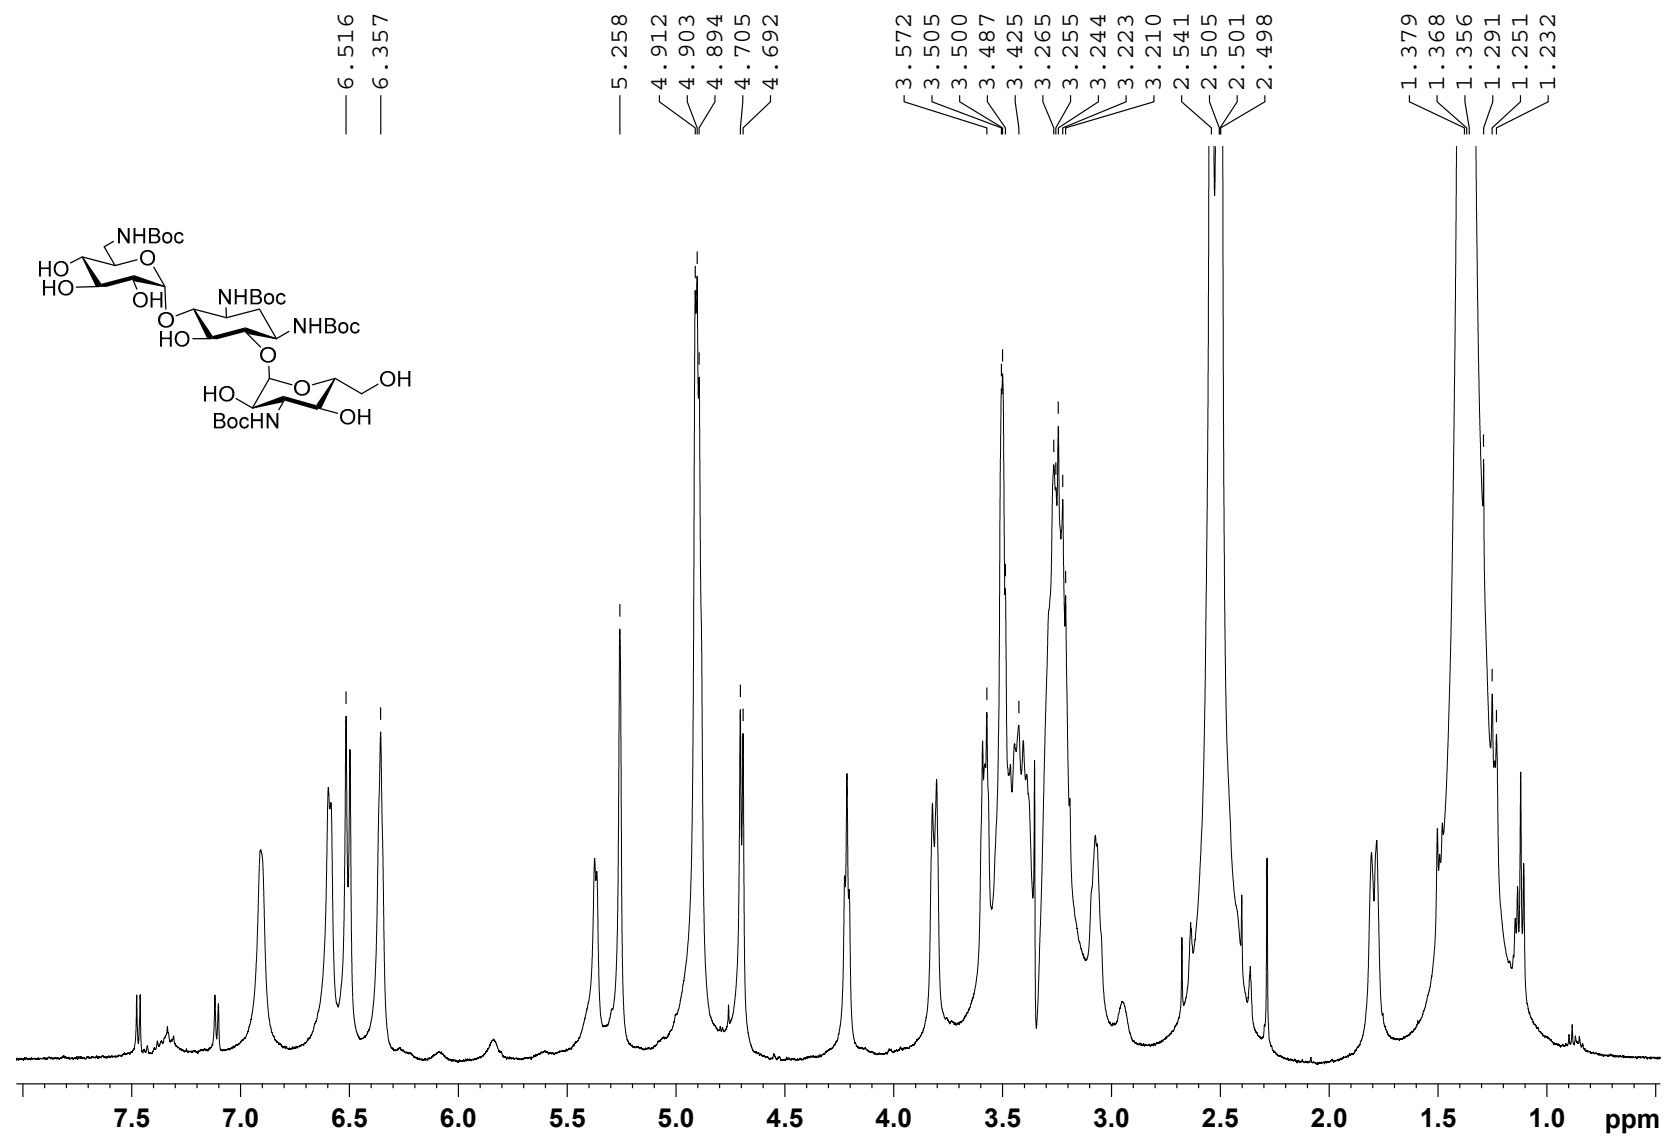

**Figure S3.**  $^1\text{H}$  NMR (500.2 MHz,  $\text{d}_6\text{-DMSO}$ ) spectrum of 1,3,6',3''-tetra-N-Boc-kanamycin A

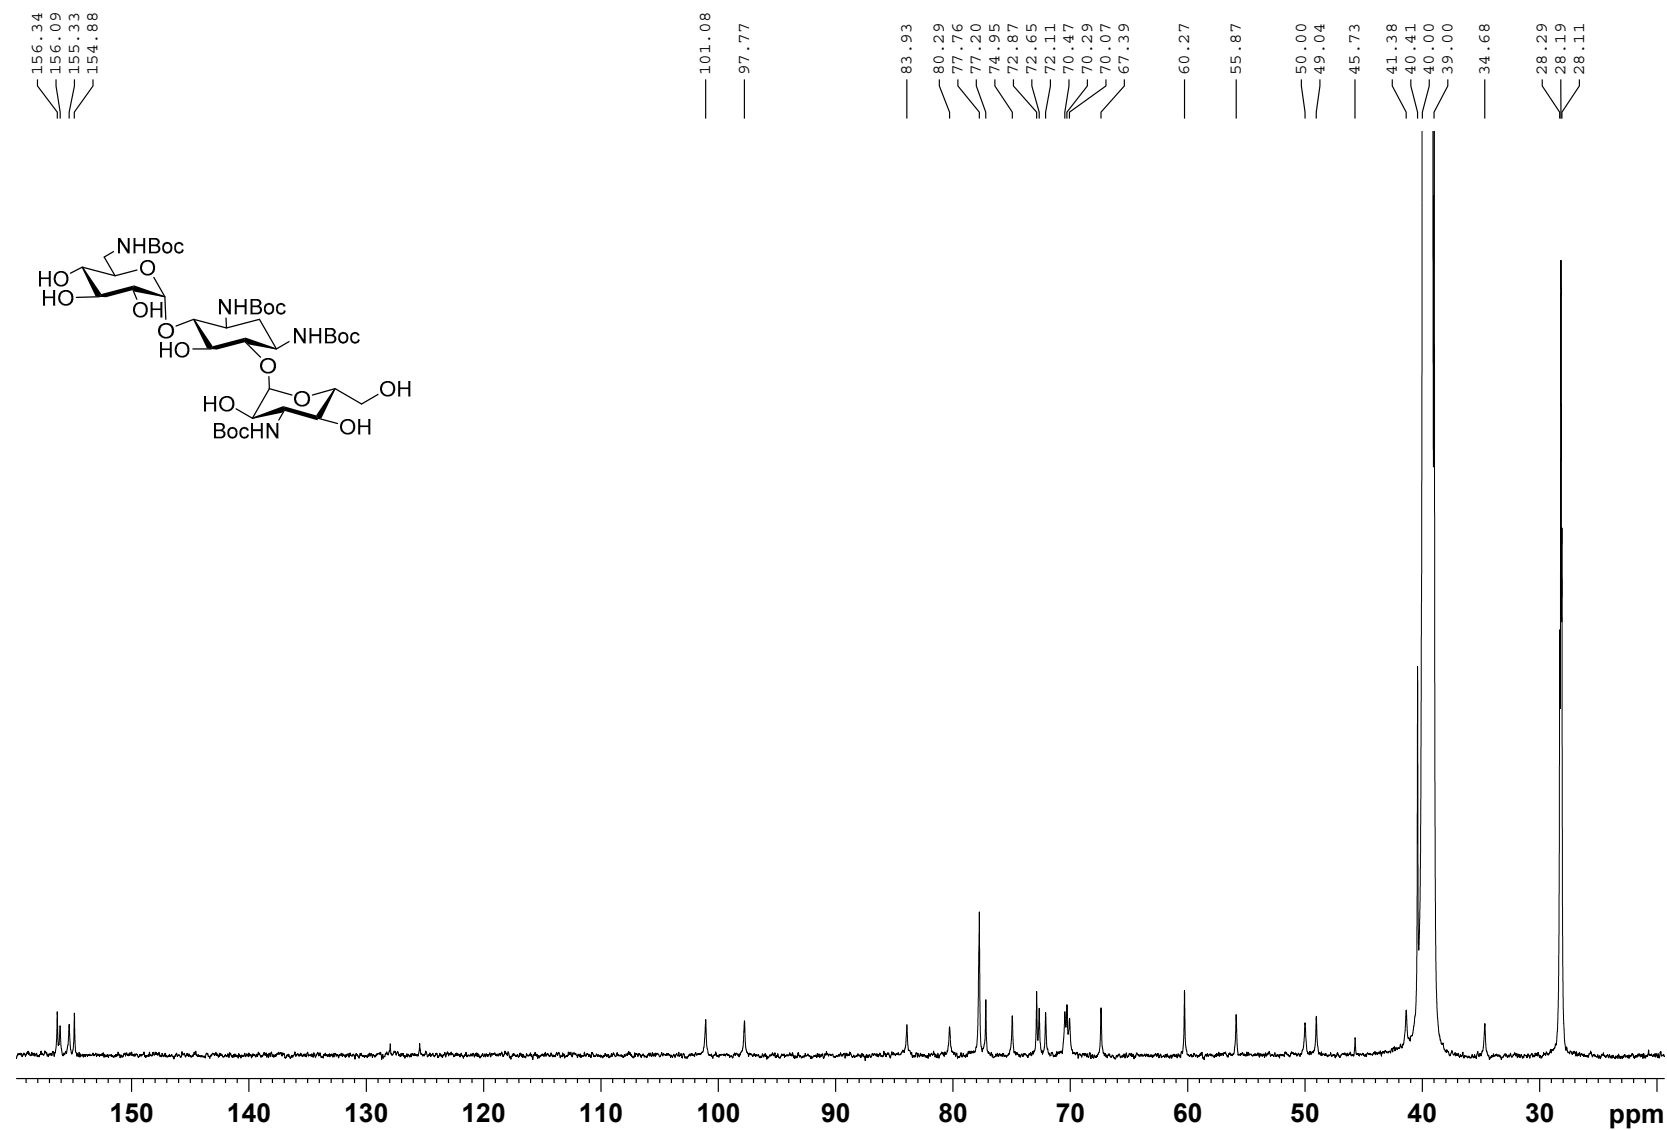

**Figure S4.** <sup>13</sup>C NMR (125.8 MHz, d<sub>6</sub>-DMSO) spectrum of 1,3,6',3''-tetra-N-Boc-kanamycin A

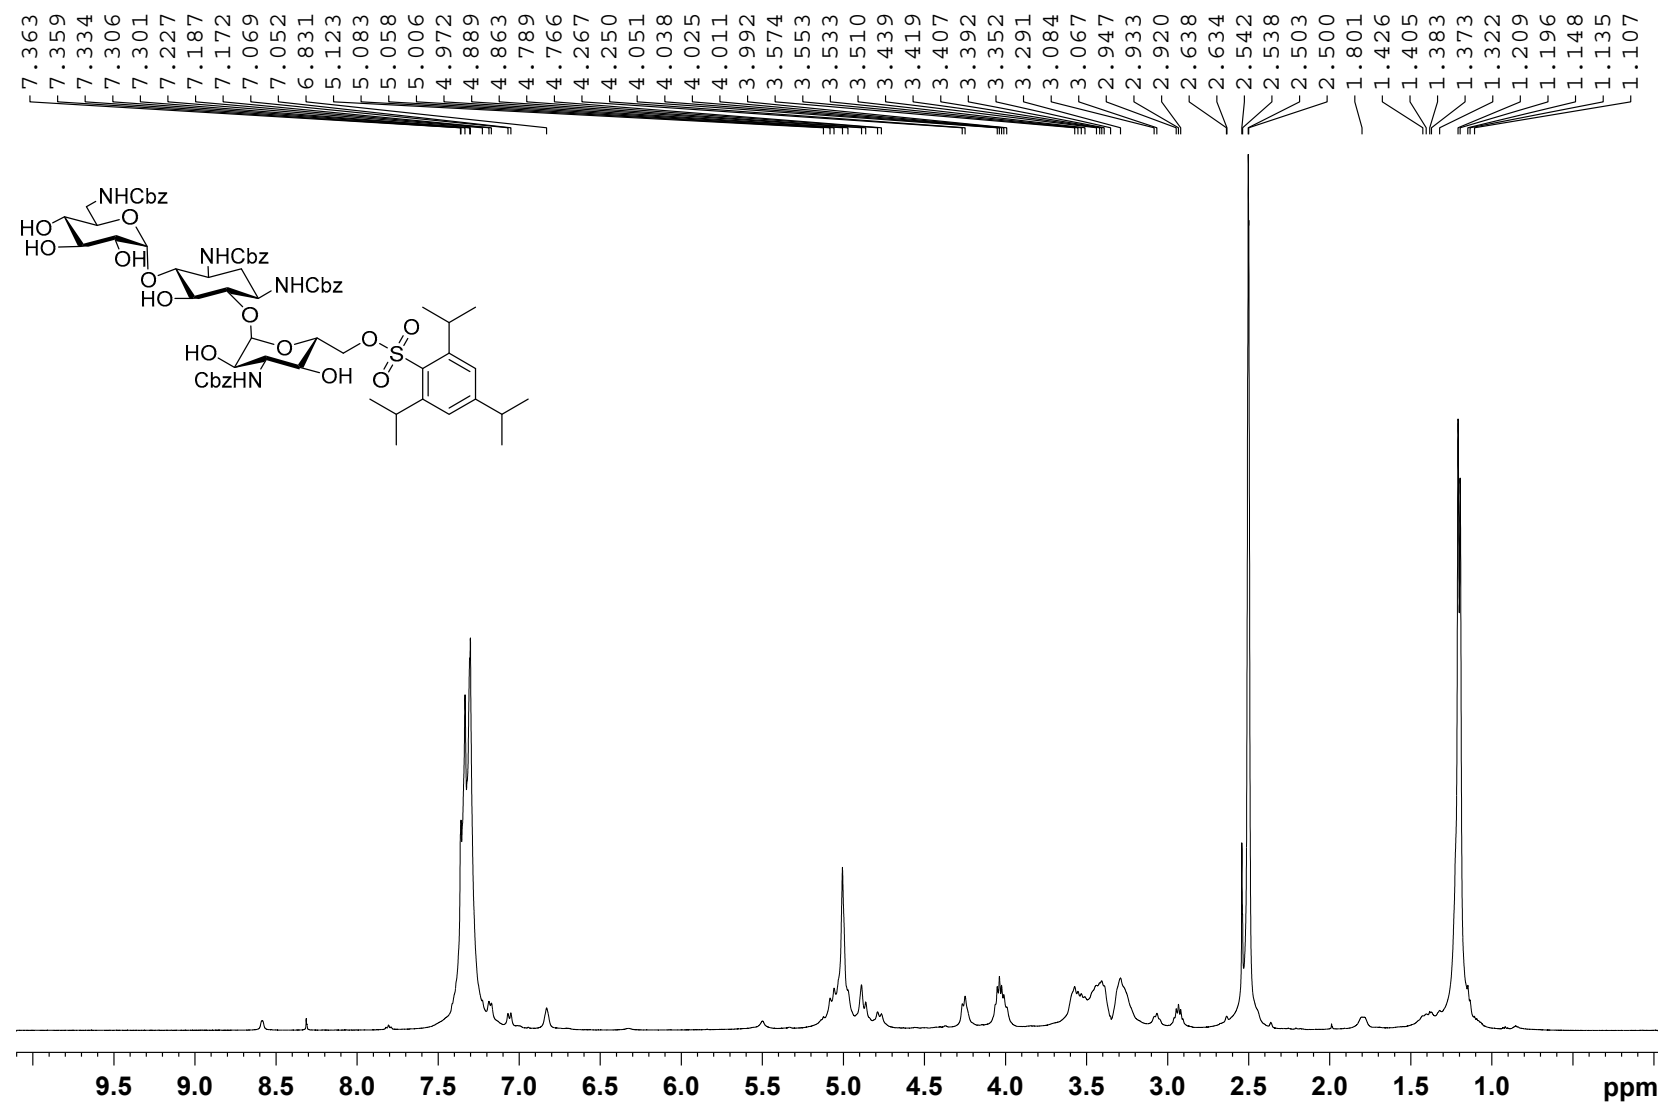

**Figure S5.**  $^1\text{H}$  NMR (500.2 MHz,  $\text{d}_6\text{-DMSO}$ ) spectrum of 1,3,6',3''-tetra-N-Cbz-6''-O-(2,4,6-triisopropylbenzenesulfonyl)kanamycin A (2)



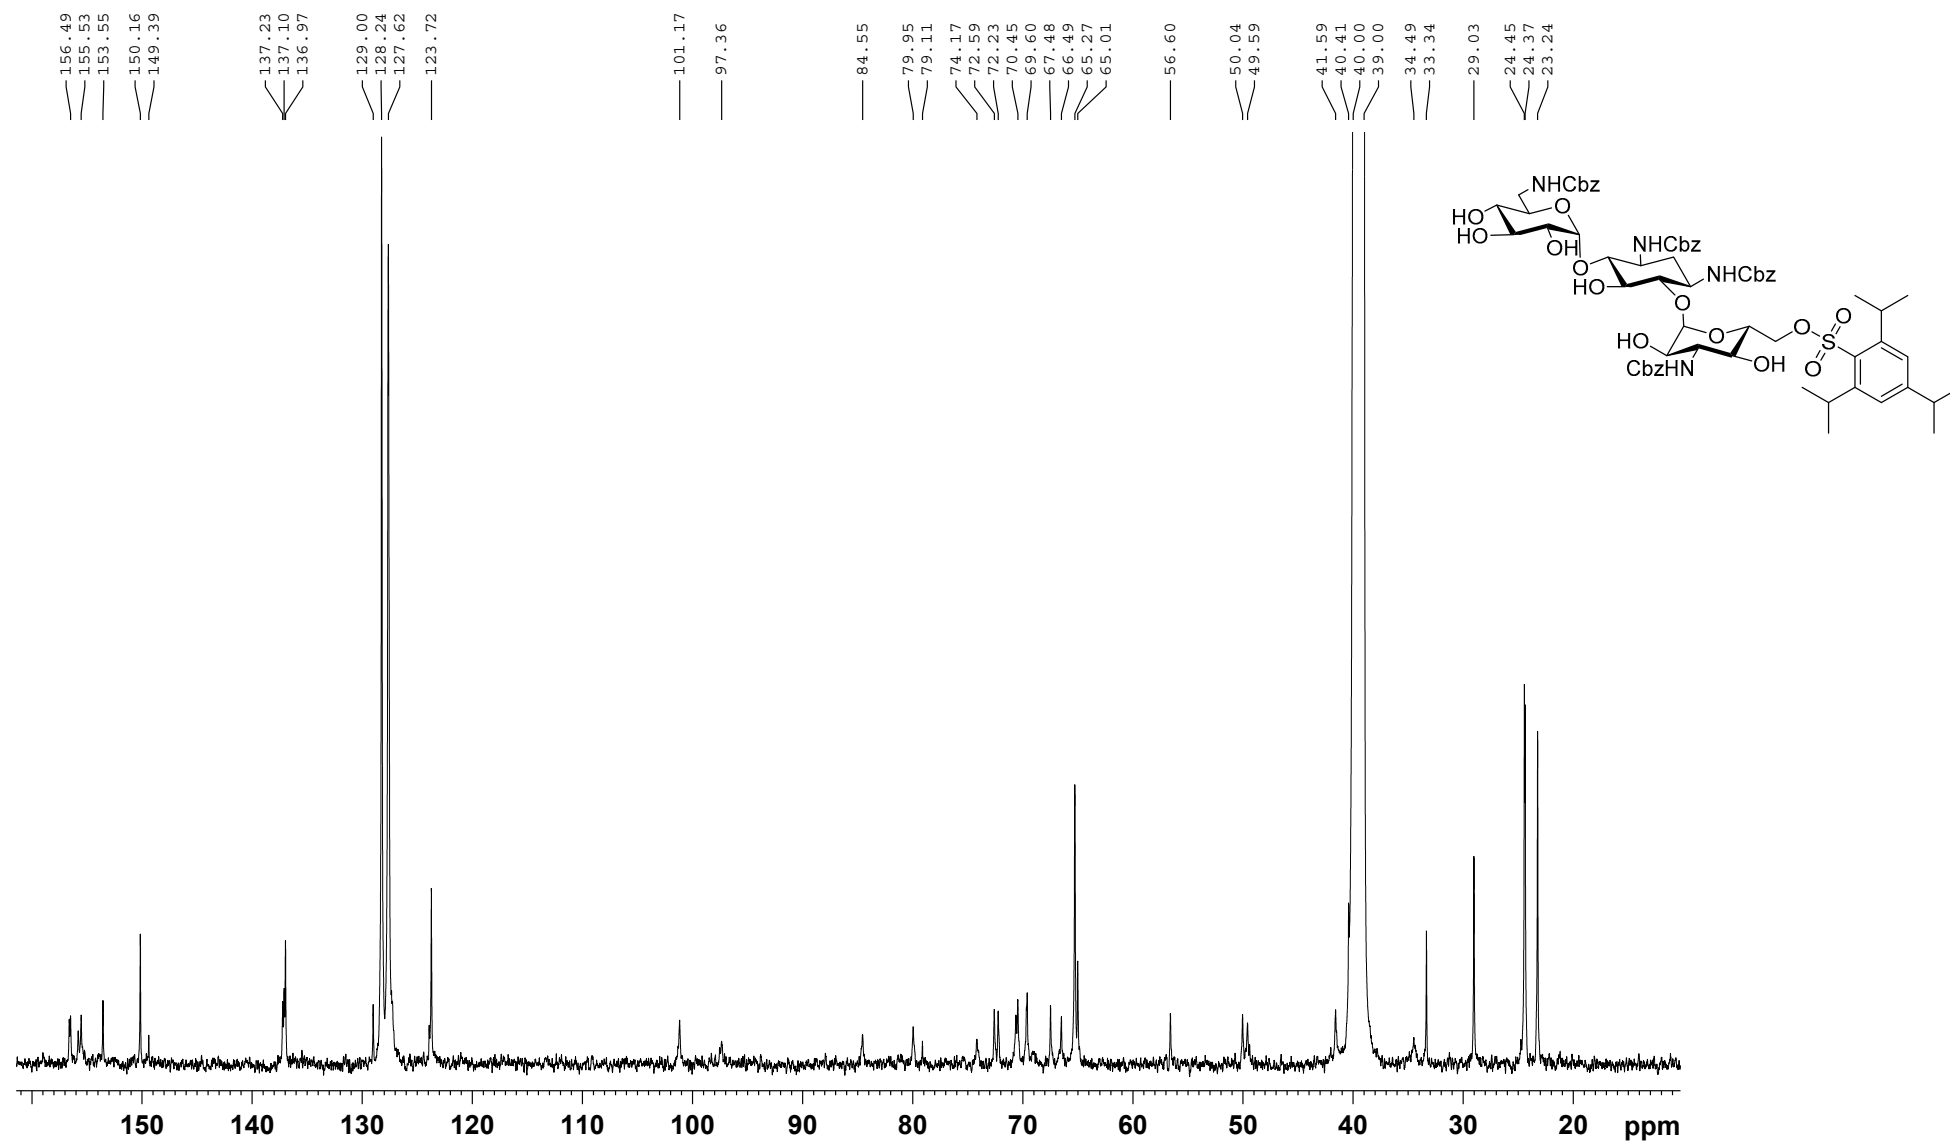

**Figure S6.** <sup>13</sup>C NMR (125.8 MHz, d<sub>6</sub>-DMSO) spectrum of 1,3,6',3''-tetra-N-Cbz-6''-O-(2,4,6-triisopropylbenzenesulfonyl)kanamycin A (**2**)

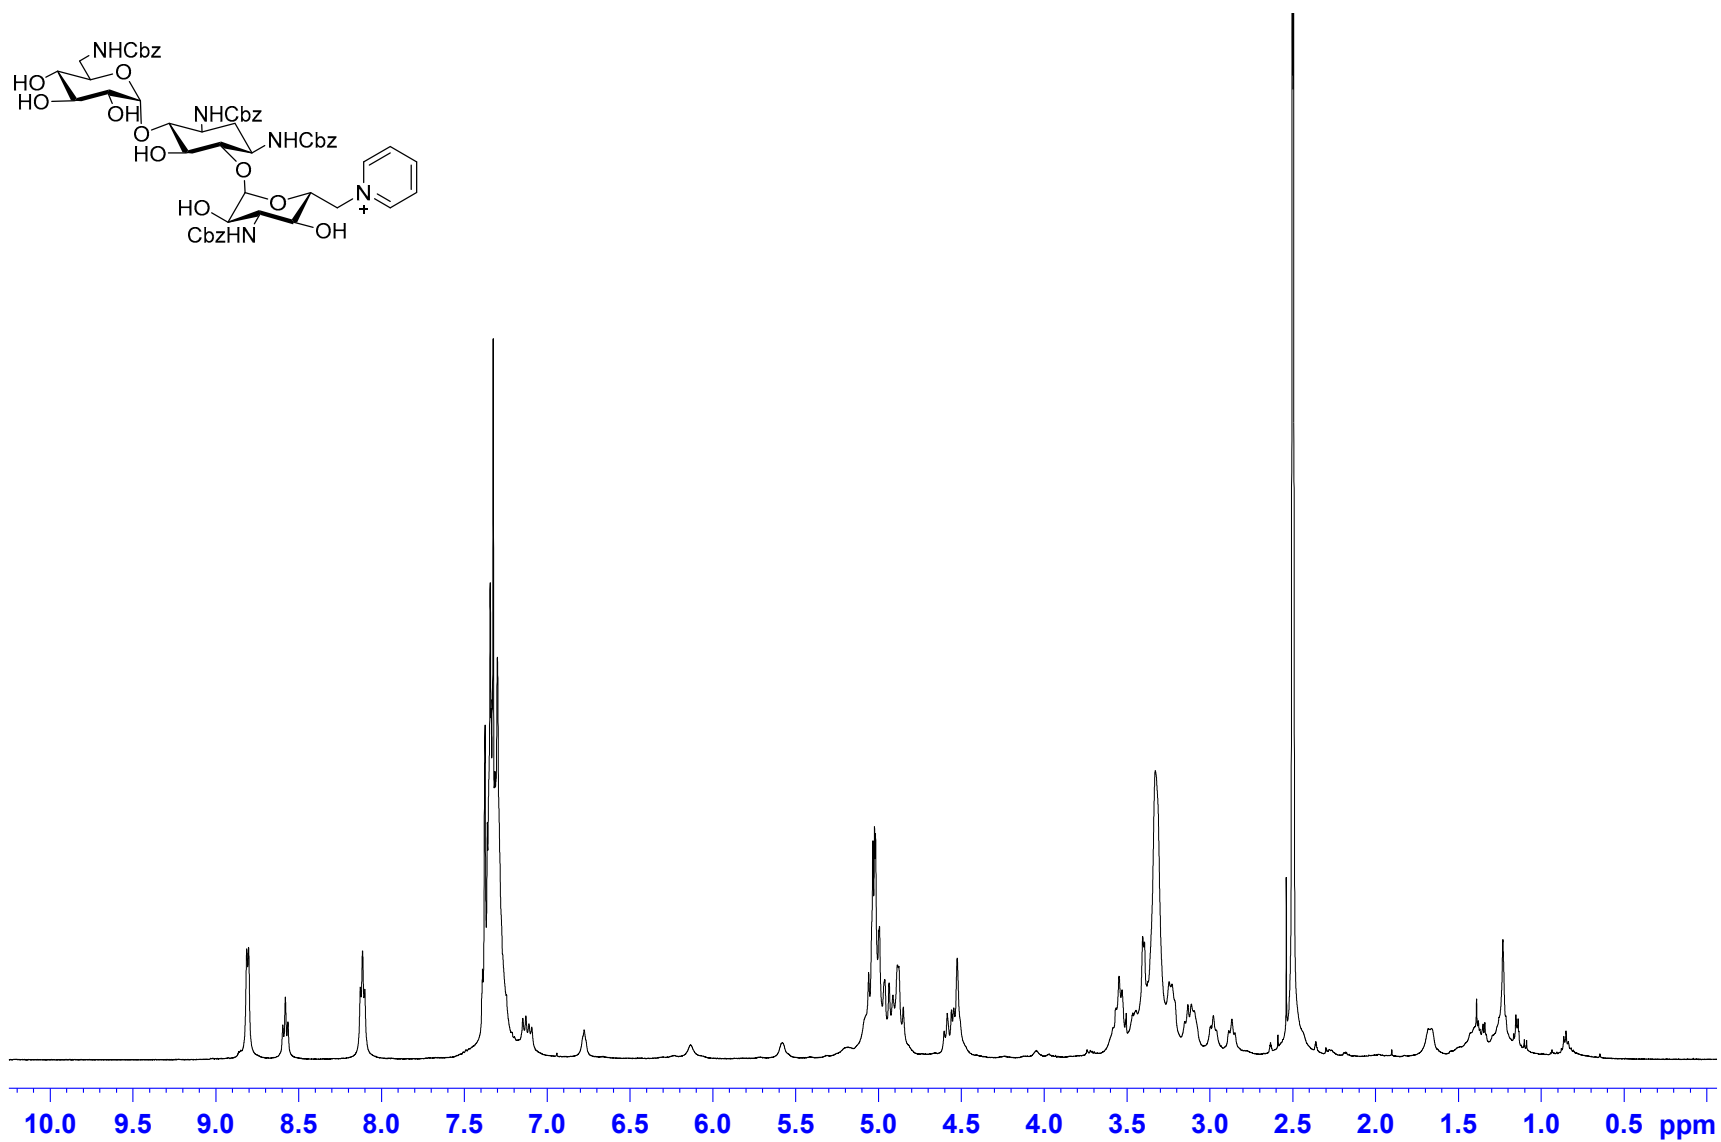

**Figure S7.** <sup>1</sup>H NMR (500.2 MHz, d<sub>6</sub>-DMSO) spectrum of 6''-(pyridine-1-ium)-1,3,6',3''-tetra-N-Cbz-6''-deoxykanamycin A (**4a**)

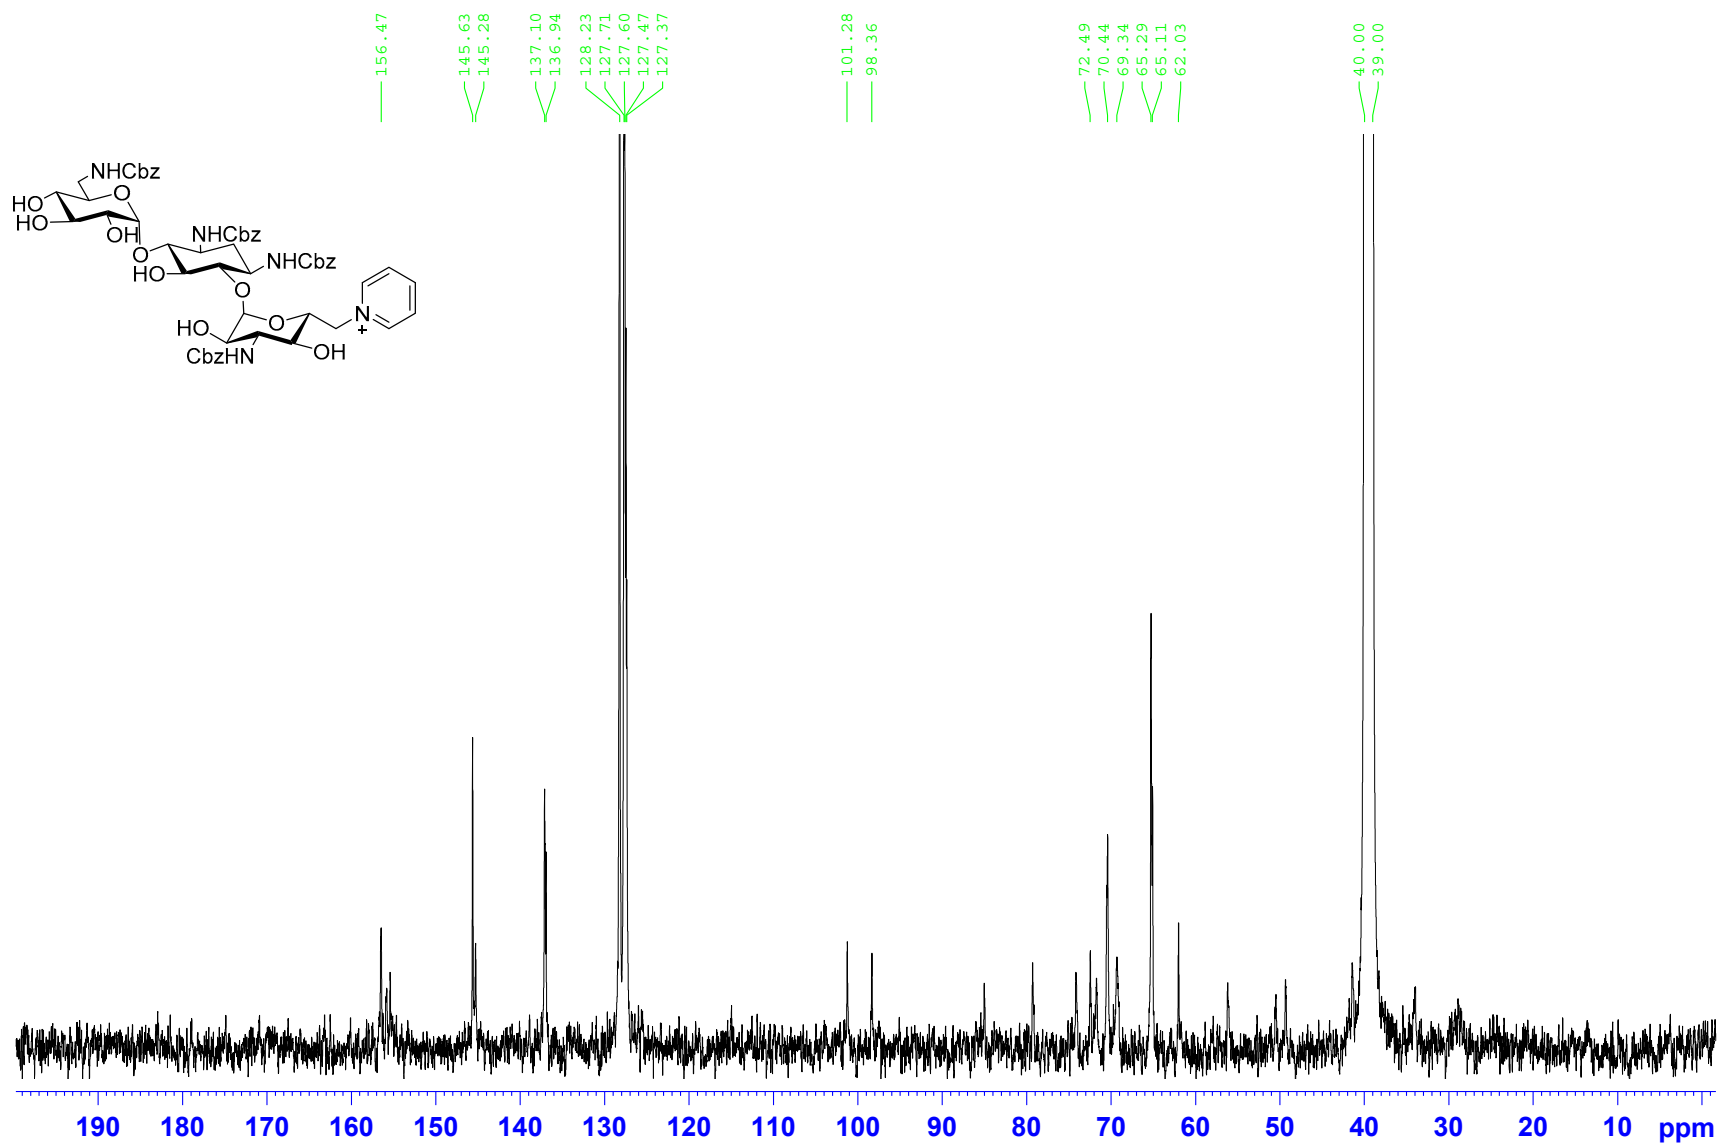

**Figure S8.**  $^{13}\text{C}$  NMR (125.8 MHz,  $\text{d}_6\text{-DMSO}$ ) spectrum of 6''-(pyridine-1-ium)-1,3,6',3''-tetra-N-Cbz-6''-deoxykanamycin A (**4a**)

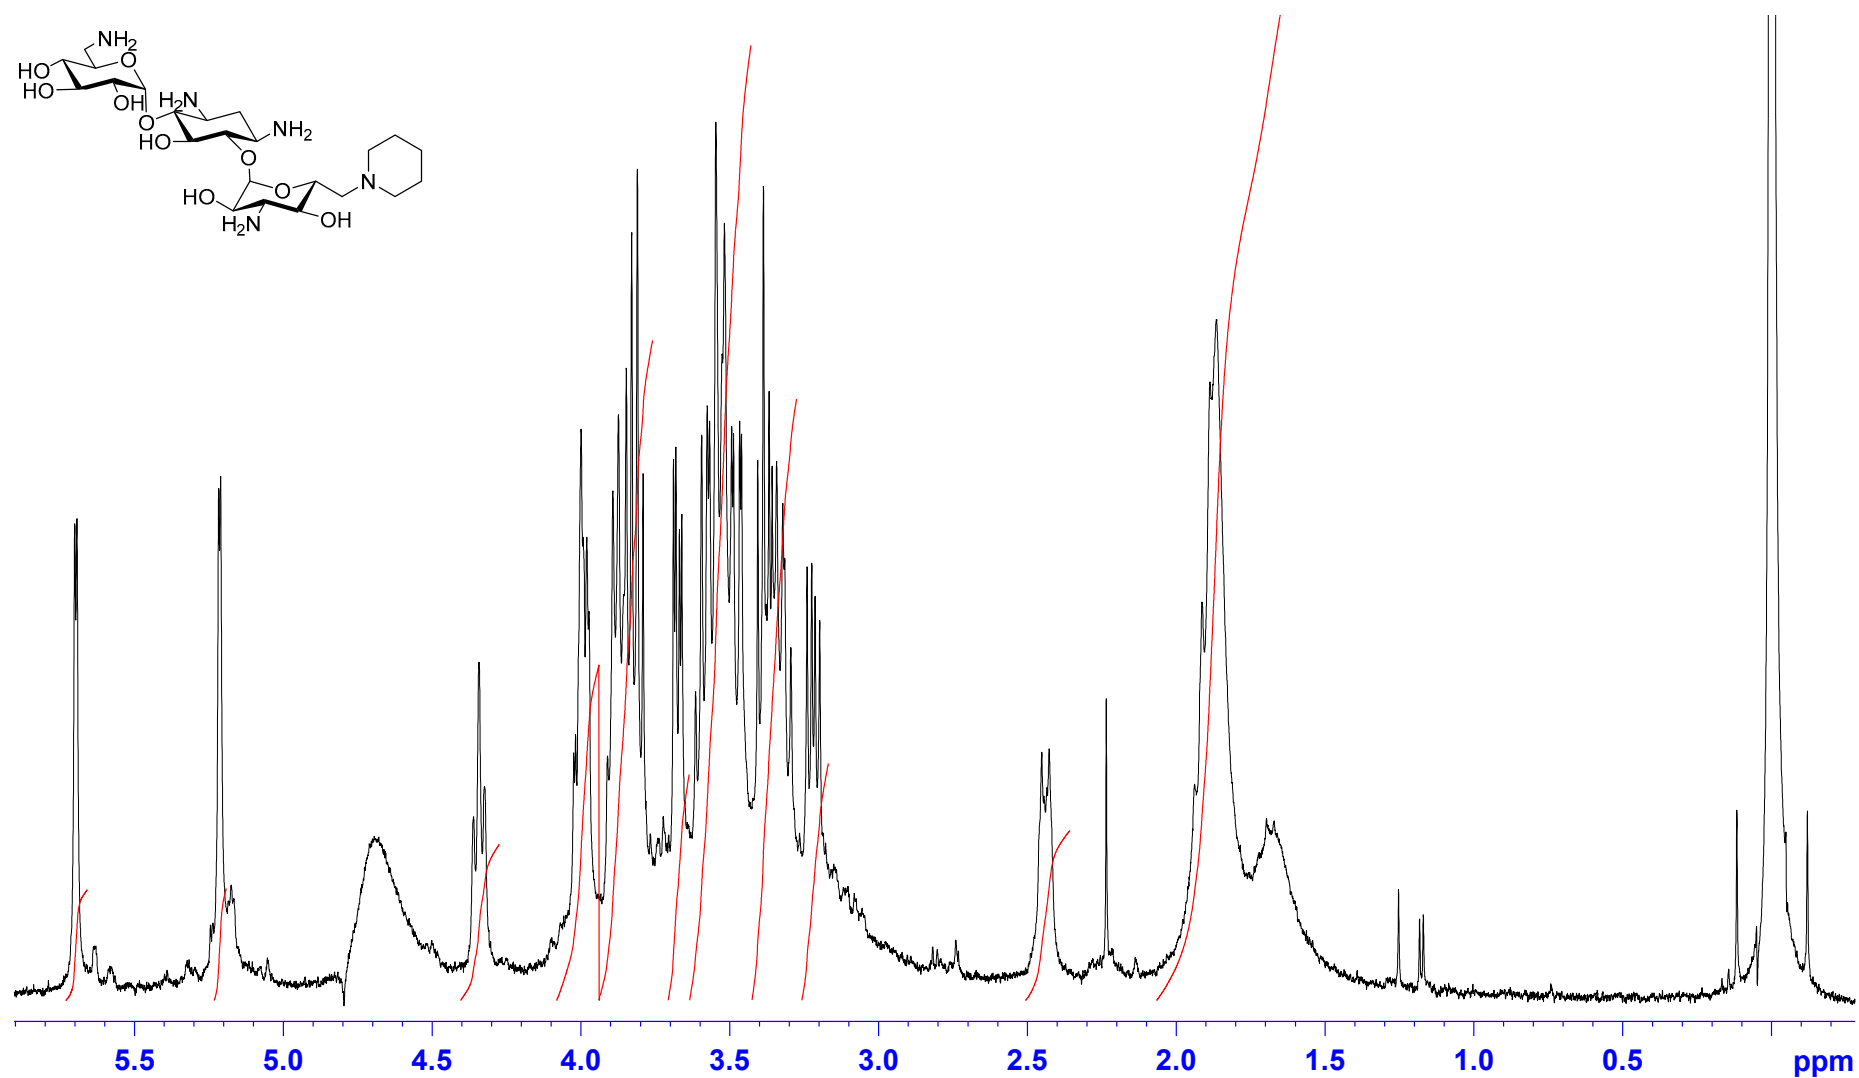

**Figure S9.**  $^1\text{H}$  NMR (500.2 MHz,  $\text{D}_2\text{O}$ ) spectrum of 6''-(piperidine-1-ium)-6''-deoxykanamycin A (4)

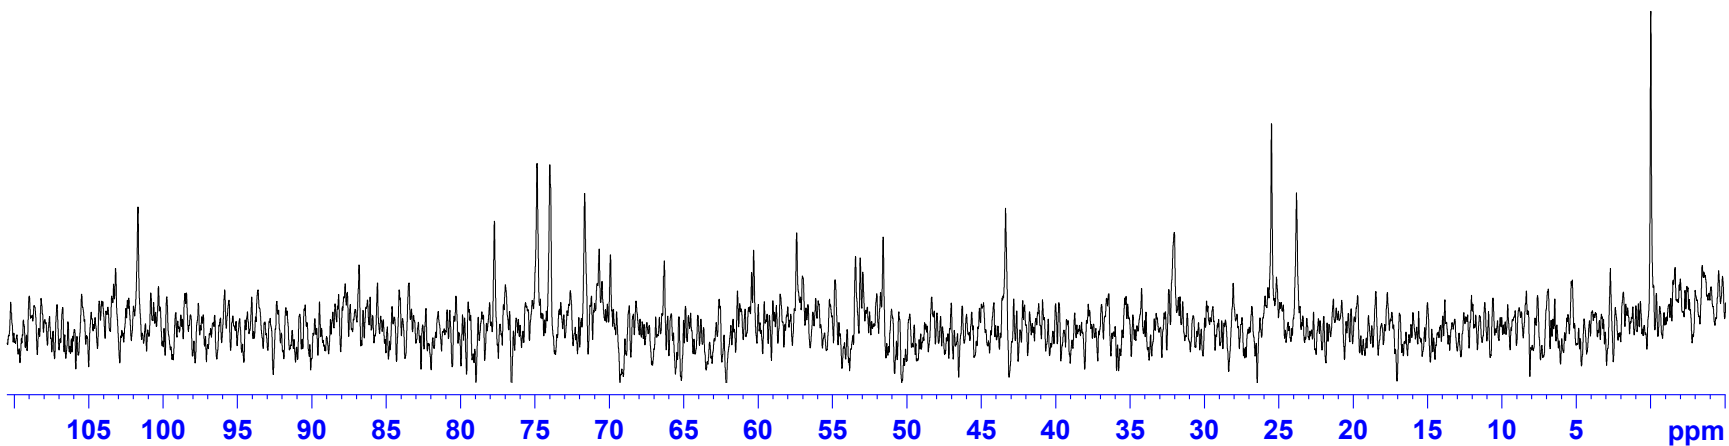

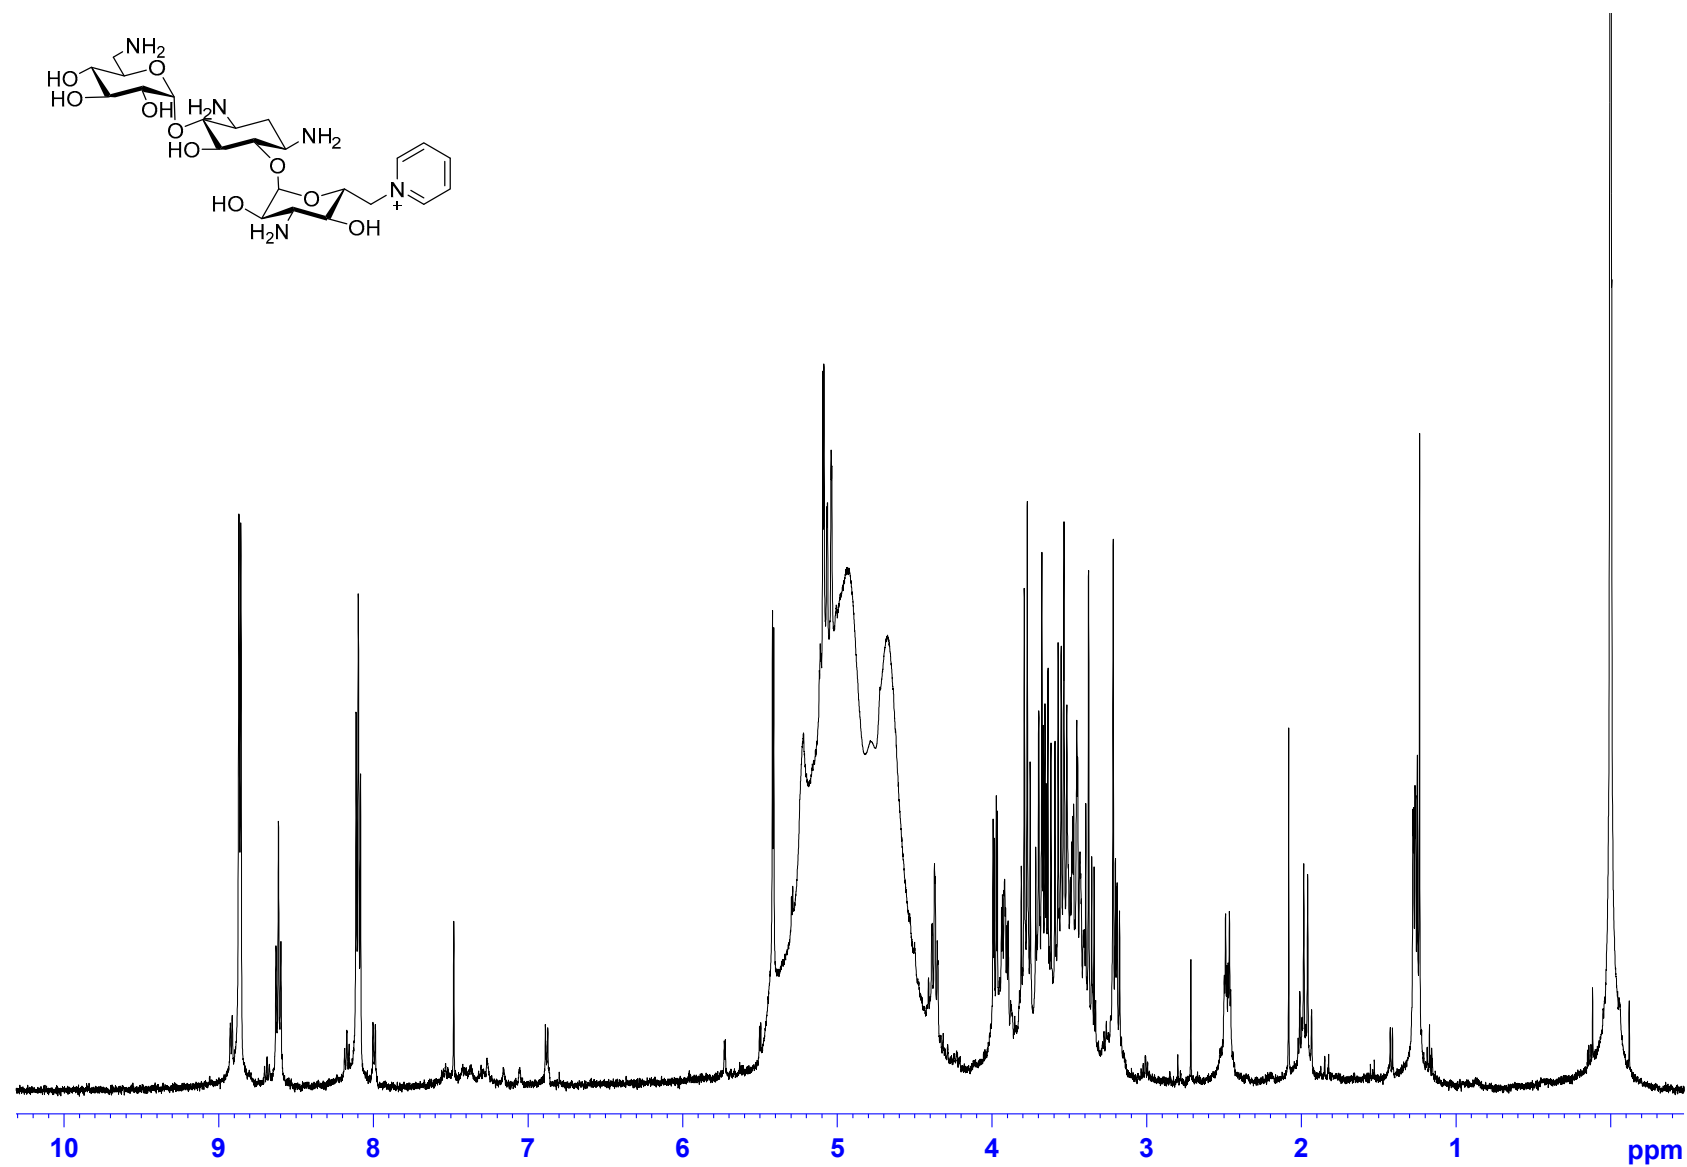

**Figure S11.** <sup>1</sup>H NMR (500.2 MHz, D<sub>2</sub>O) spectrum of 6''-(pyridine-1-ium)-6''-deoxykanamycin A (5)

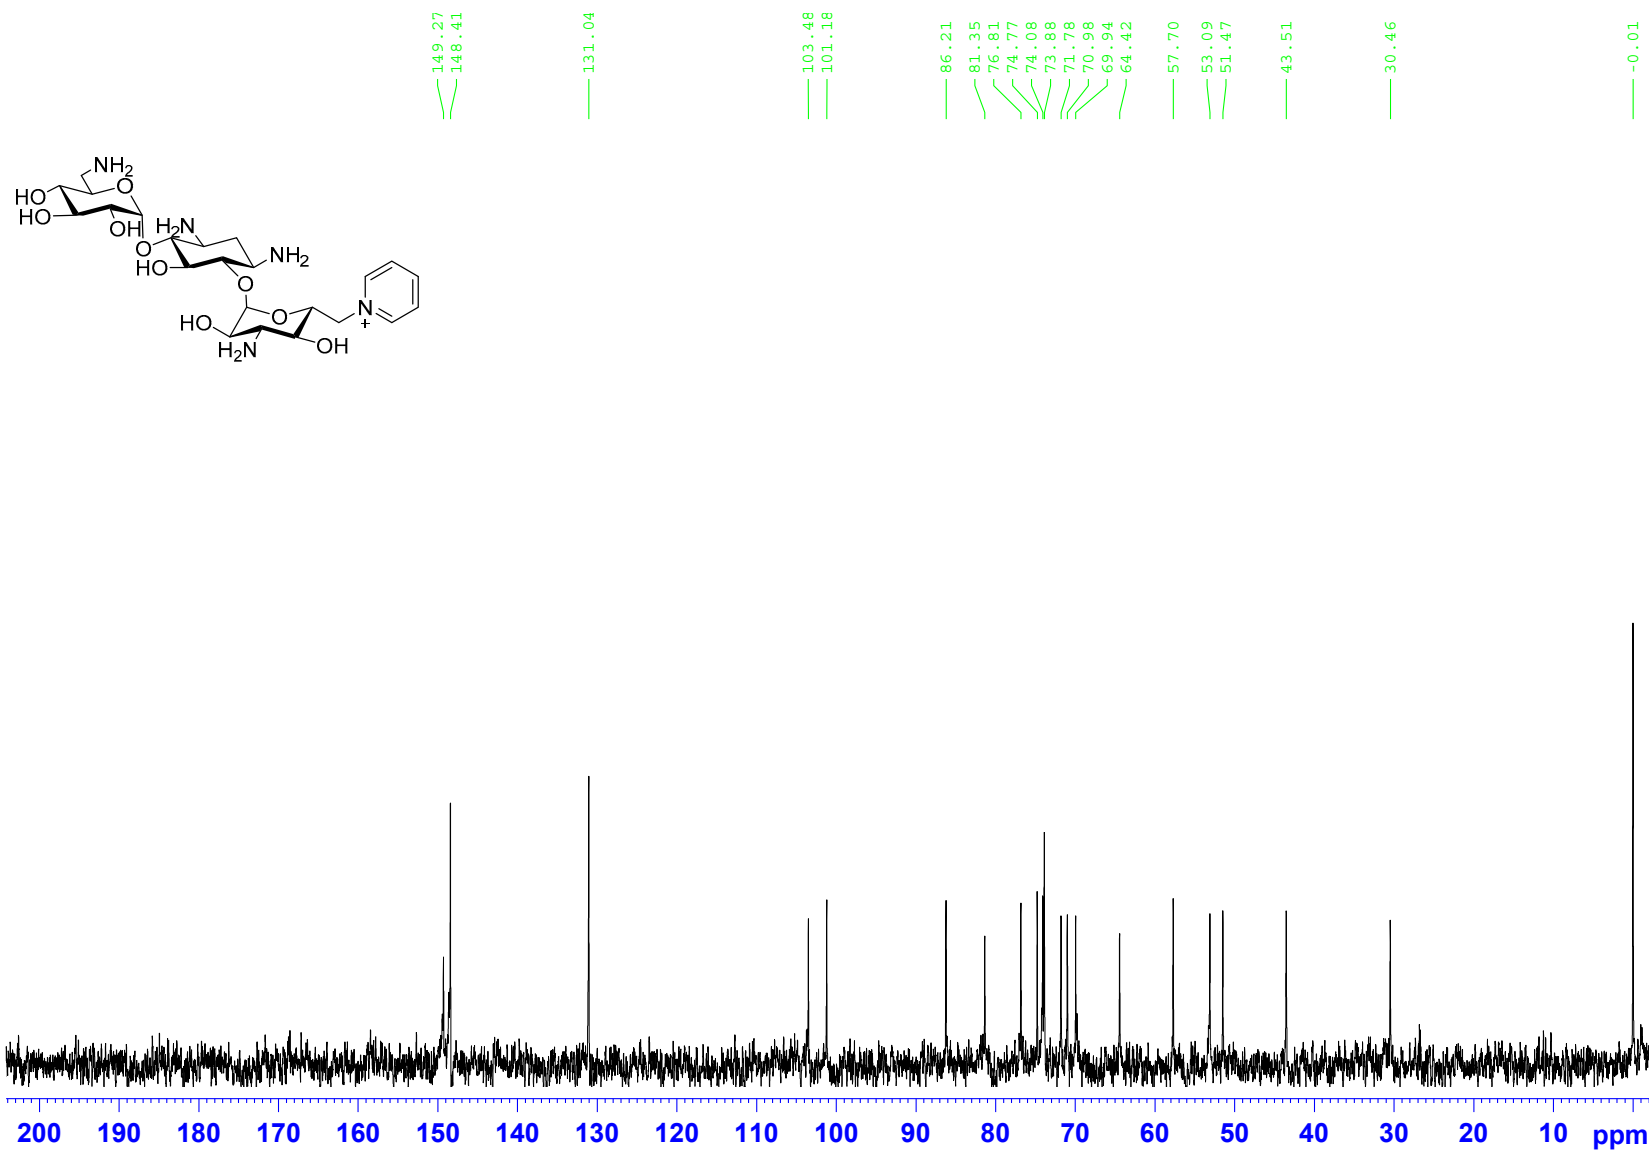

**Figure S12.**  $^{13}\text{C}$  NMR (125.8 MHz,  $\text{D}_2\text{O}$ ) spectrum of 6''-(pyridine-1-ium)-6''-deoxykanamycin A (5)





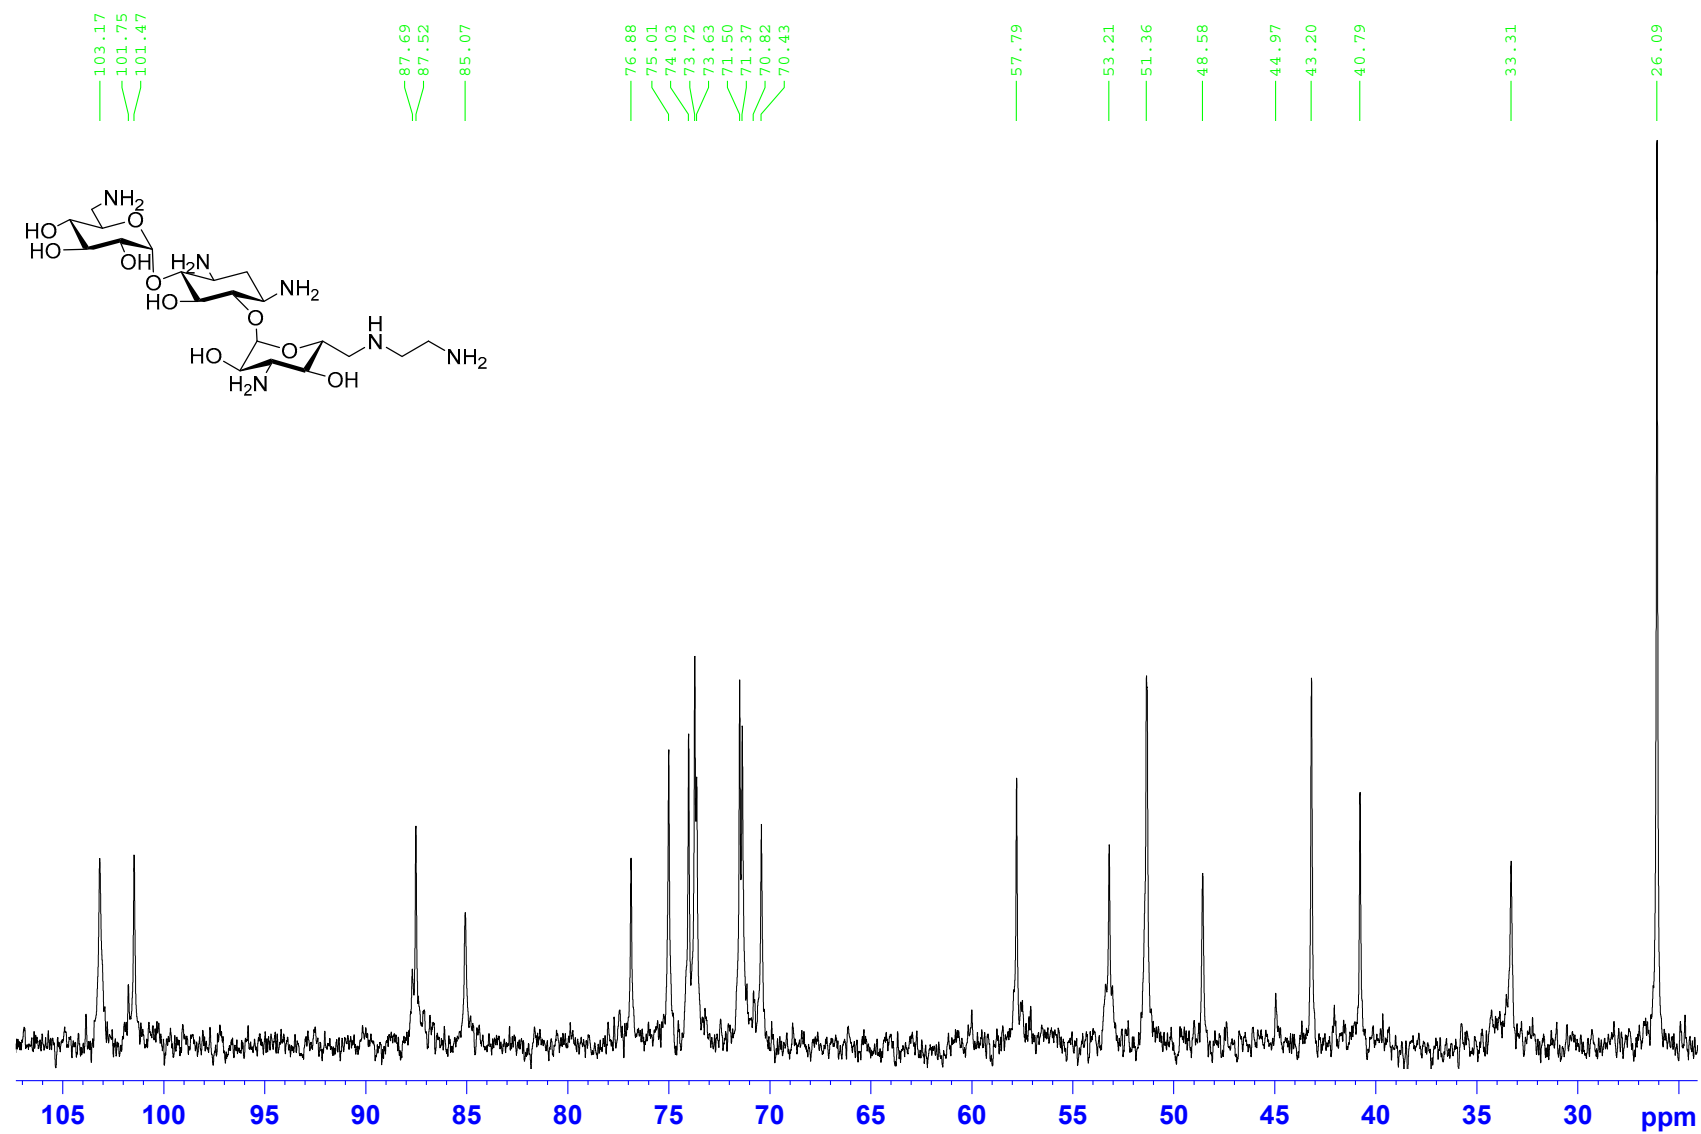

**Figure S14.** <sup>13</sup>C NMR (125.8 MHz, D<sub>2</sub>O) spectrum of 6''-(2-aminoethyl-1-amino)-6''-deoxykanamycin A (6)

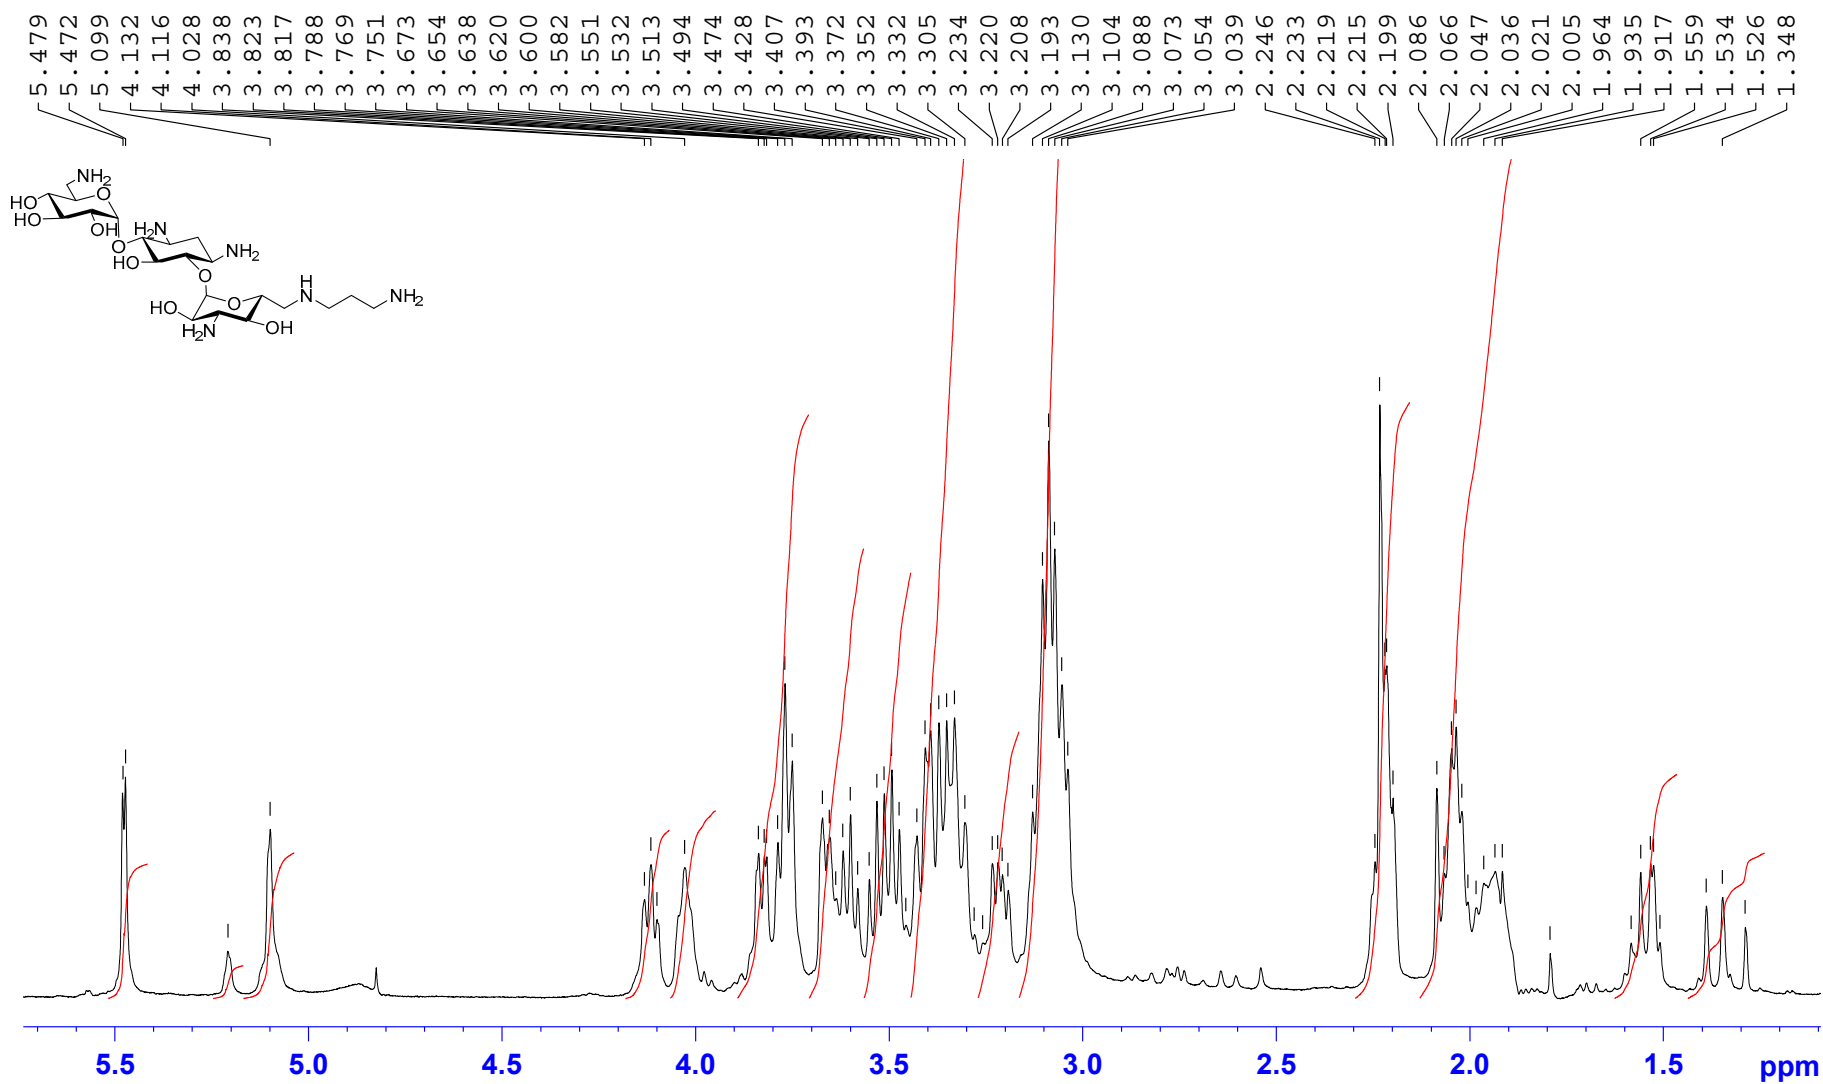

**Figure S15.** <sup>1</sup>H NMR (500.2 MHz, D<sub>2</sub>O) spectrum of 6''-(3-aminopropyl-1-amino)-6''-deoxykanamycin A (7)

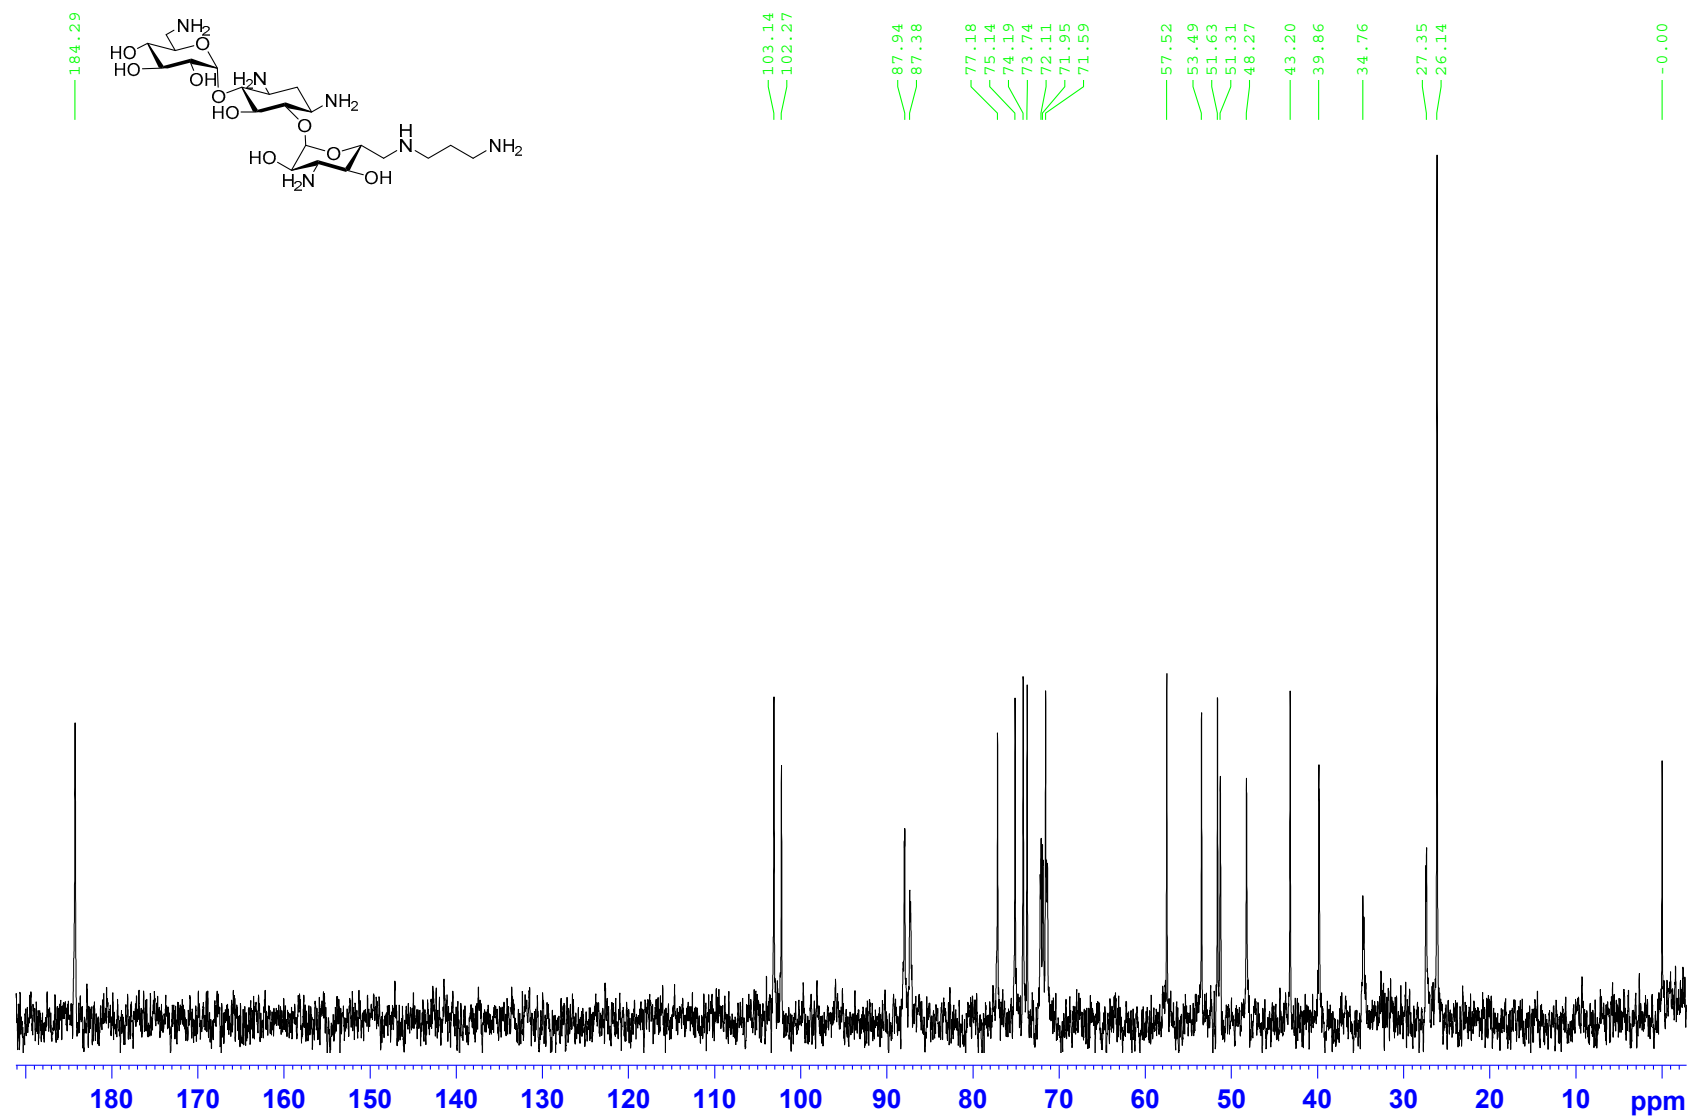

**Figure S16.**  $^{13}\text{C}$  NMR (125.8 MHz,  $\text{D}_2\text{O}$ ) spectrum of 6''-(3-aminopropyl-1-amino)-6''-deoxykanamycin A (7)

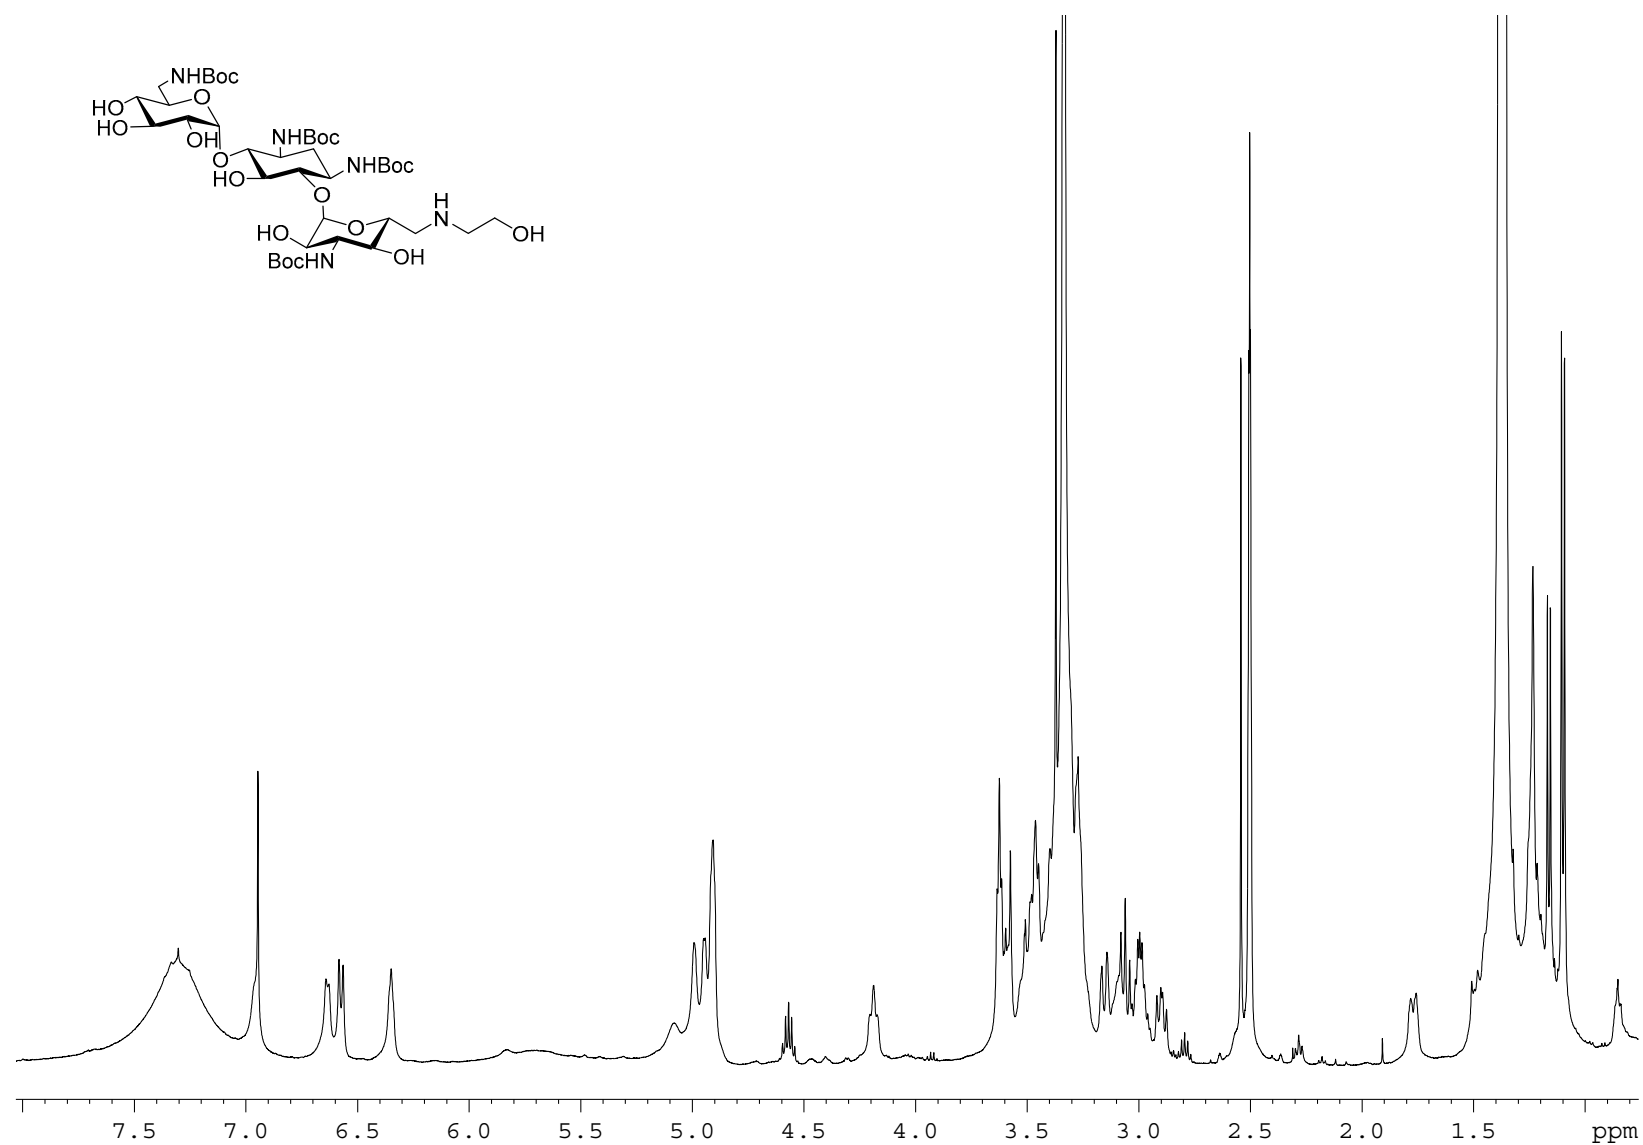

**Figure S17.** <sup>1</sup>H NMR (500.2 MHz, d<sub>6</sub>-DMSO) spectrum of 6''-(2-hydroxyethyl-1-amino)-1,3,6',3''-tetra-N-Boc-6''-deoxykanamycin A (**8a**)

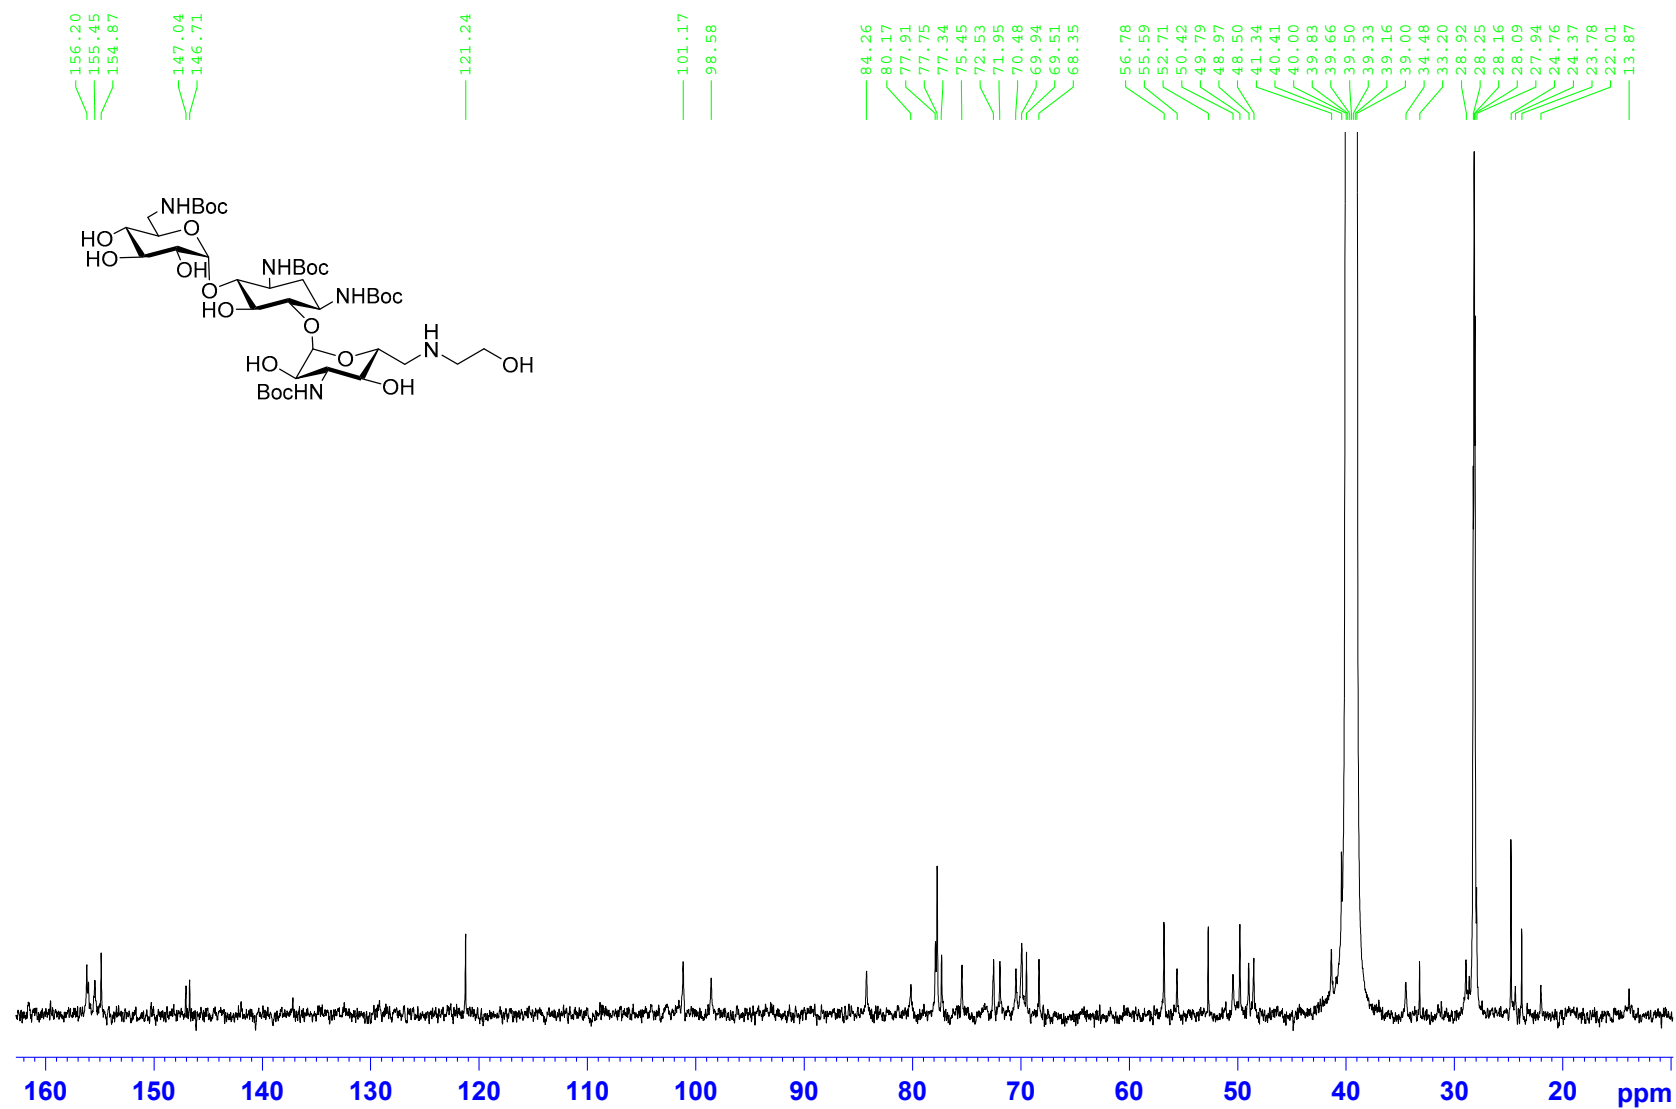

**Figure S18.** <sup>13</sup>C NMR (125.8 MHz, d<sub>6</sub>-DMSO) spectrum of 6''-(2-hydroxyethyl-1-amino)-1,3,6',3''-tetra-N-Boc-6''-deoxykanamycin A (**8a**)

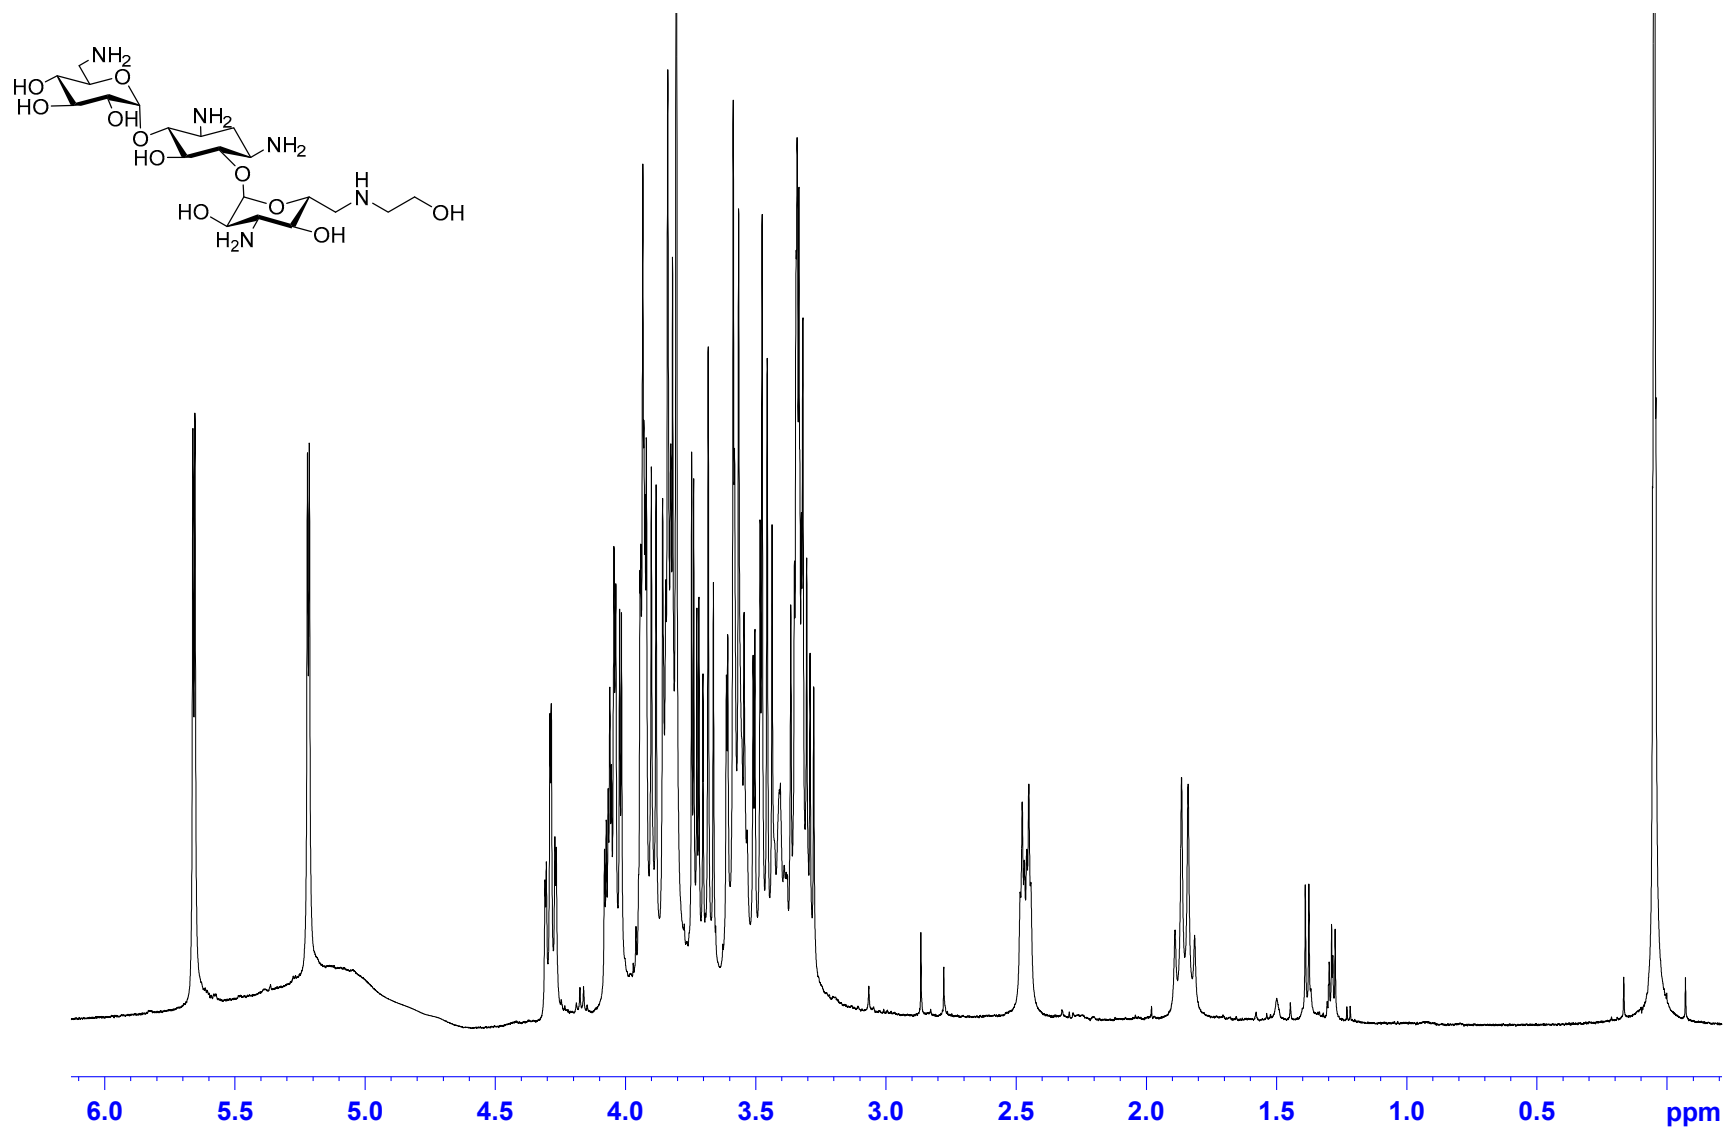

**Figure S19.**  $^1\text{H}$  NMR (500.2 MHz,  $\text{D}_2\text{O}$ ) spectrum of 6''-(2-hydroxyethyl-1-amino)-6''-deoxykanamycin A (**8**)

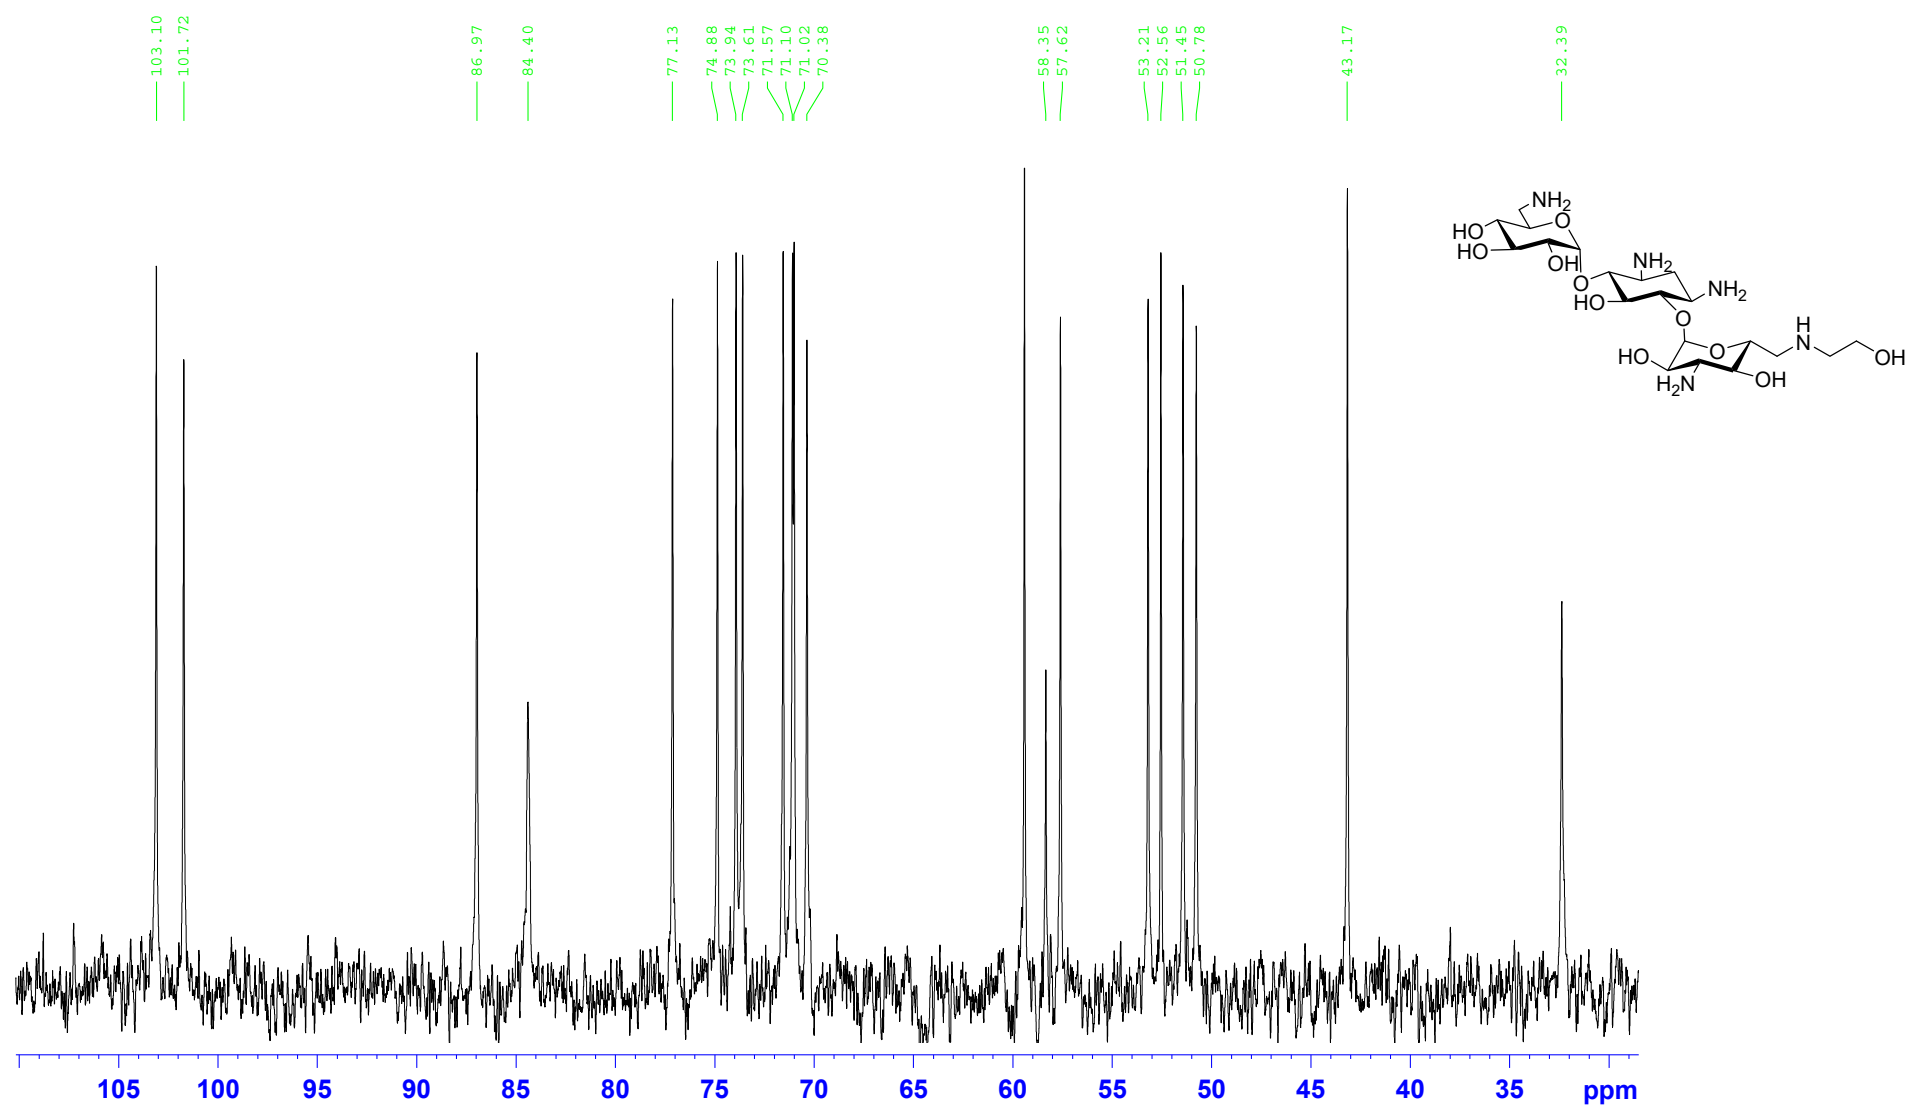

**Figure S20.**  $^{13}\text{C}$  NMR (125.8 MHz,  $\text{D}_2\text{O}$ ) spectrum of 6''-(2-hydroxyethyl-1-amino)-6''-deoxykanamycin A (8)







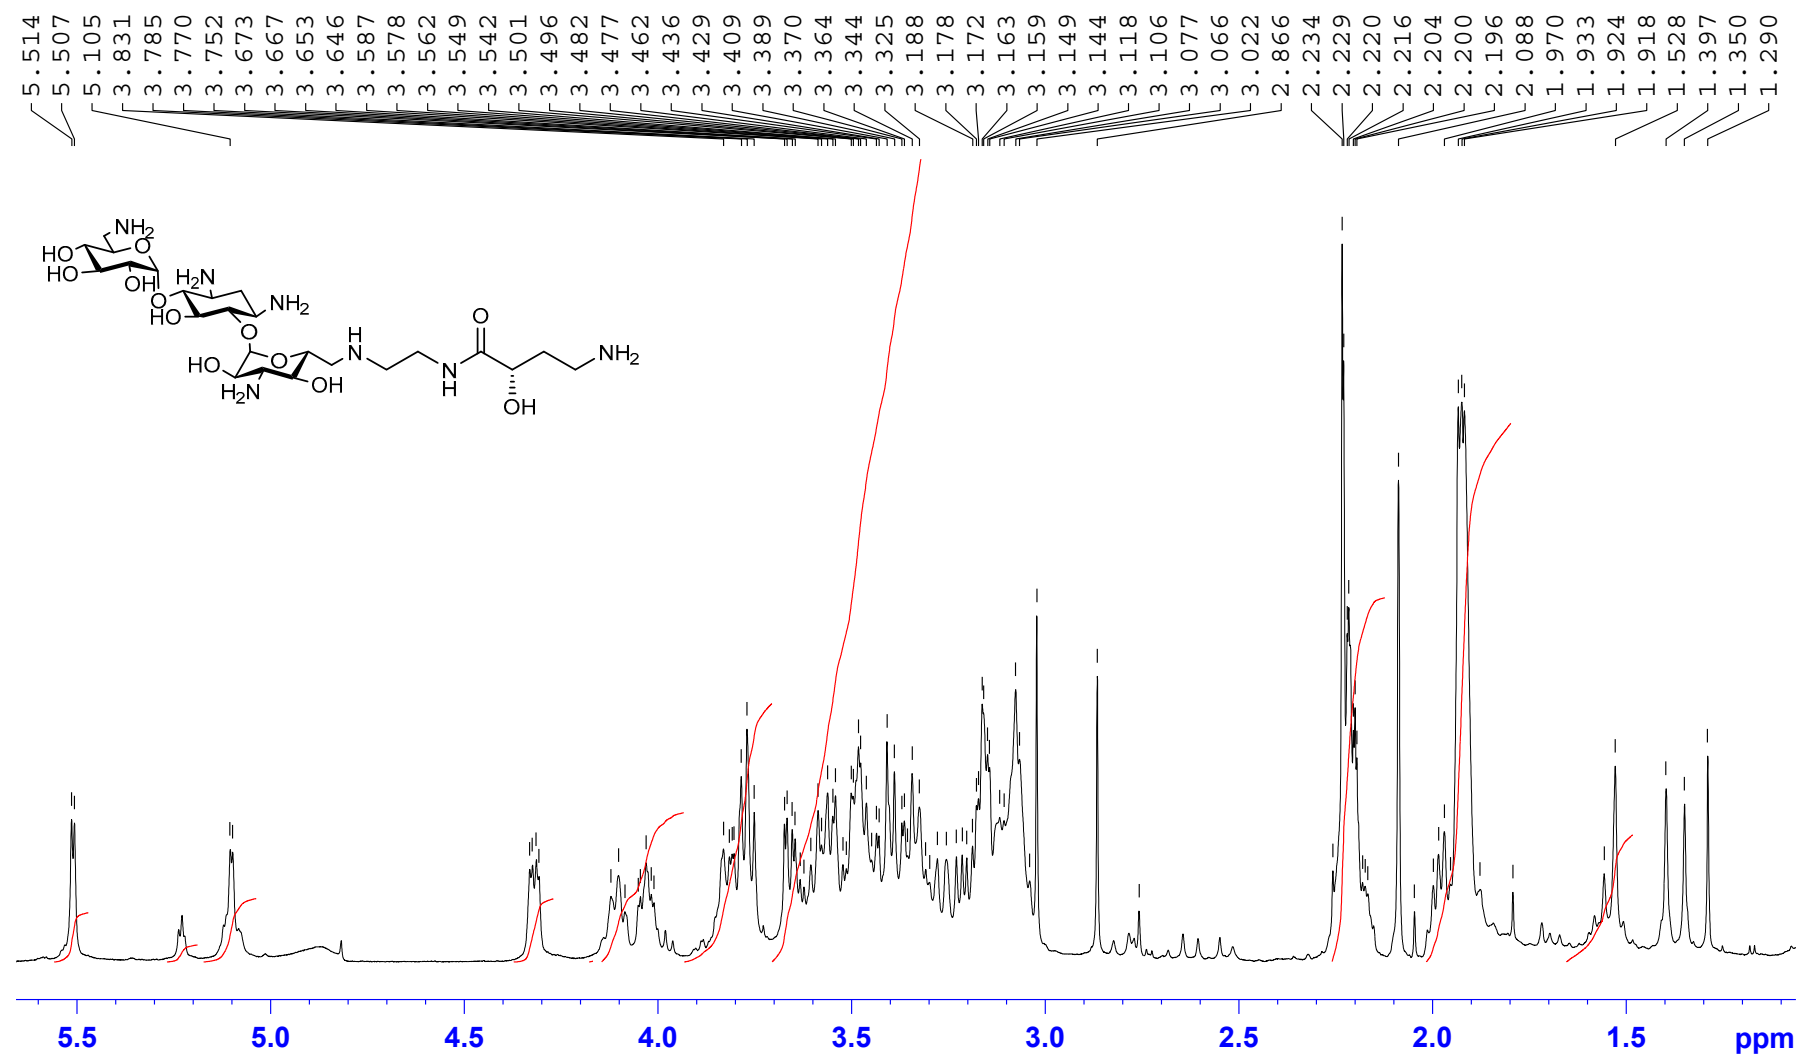

**Figure S23.** <sup>1</sup>H NMR (500.2 MHz, D<sub>2</sub>O) spectrum of 6''-(2-((*S*)-4-amino-2-hydroxy)-*N*-(ethyl-1-amino)butanamide))-6''-deoxykanamycin A (**9**)

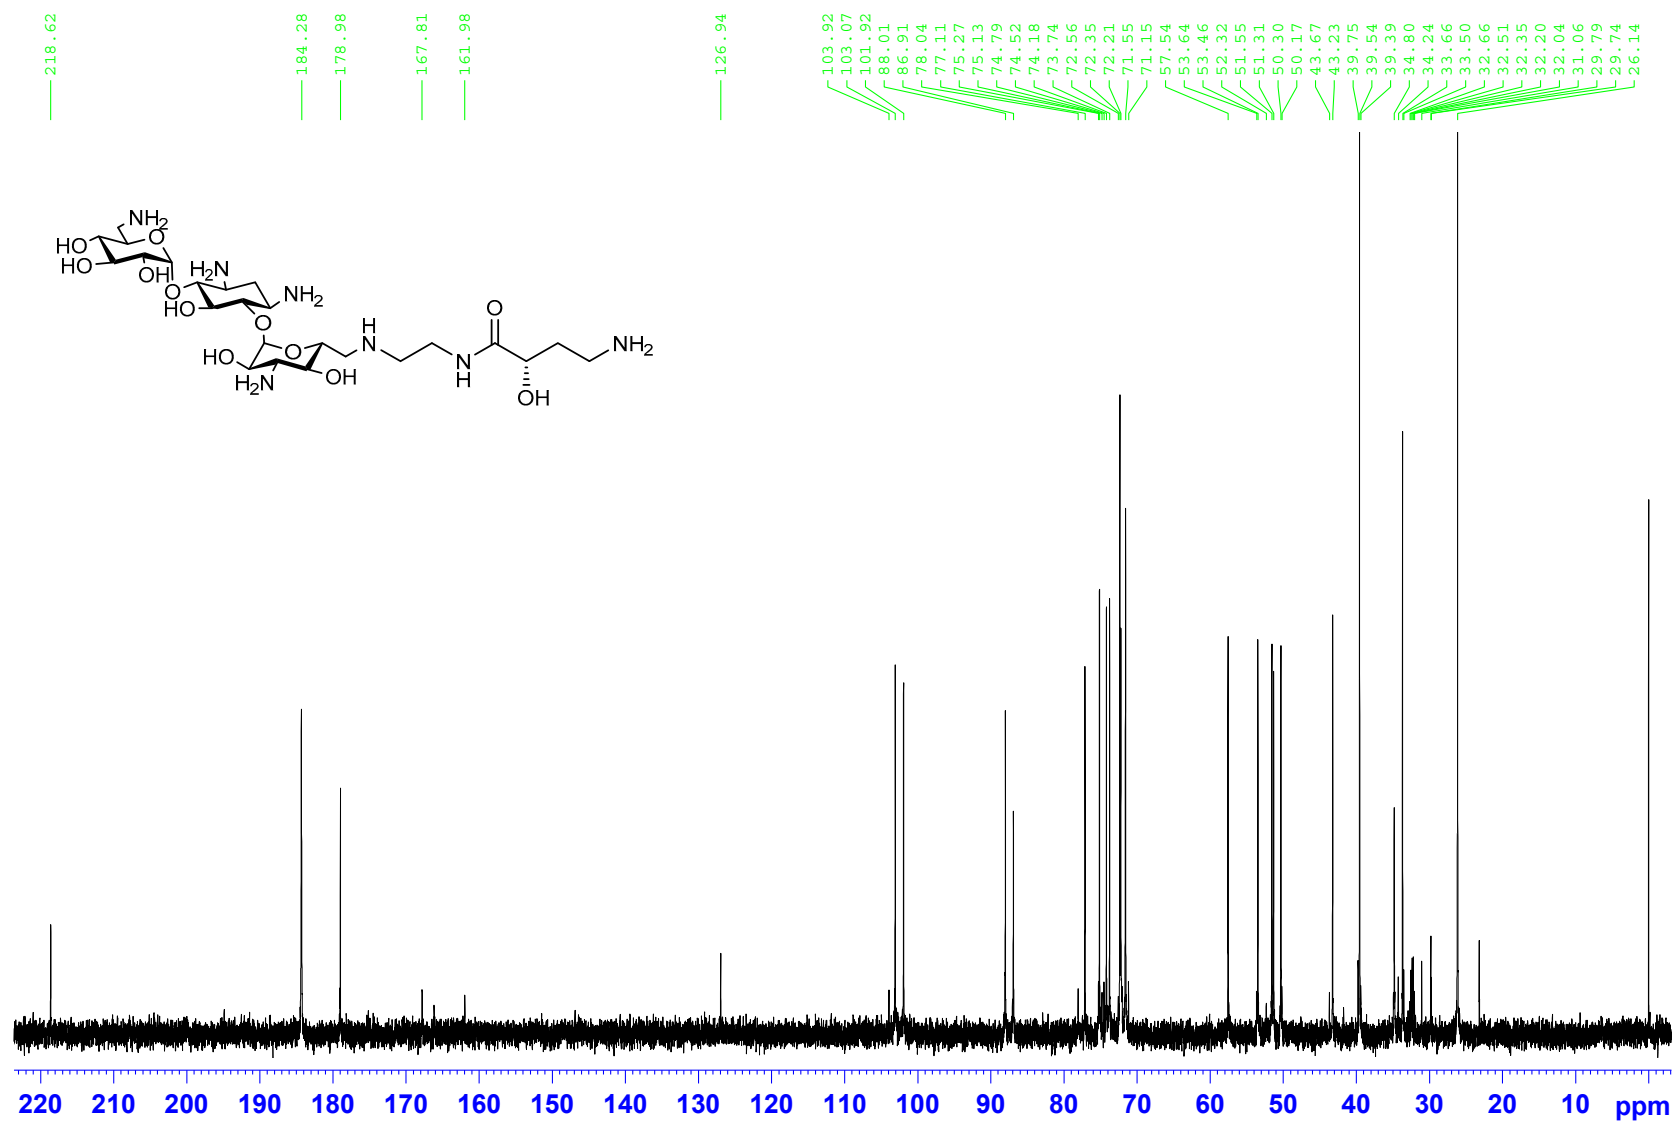

**Figure S24.** <sup>13</sup>C NMR (125.8 MHz, D<sub>2</sub>O) spectrum of 6''-(2-((*S*)-4-amino-2-hydroxy)-*N*-(ethyl-1-amino)butanamide))-6''-deoxykanamycin A (9)

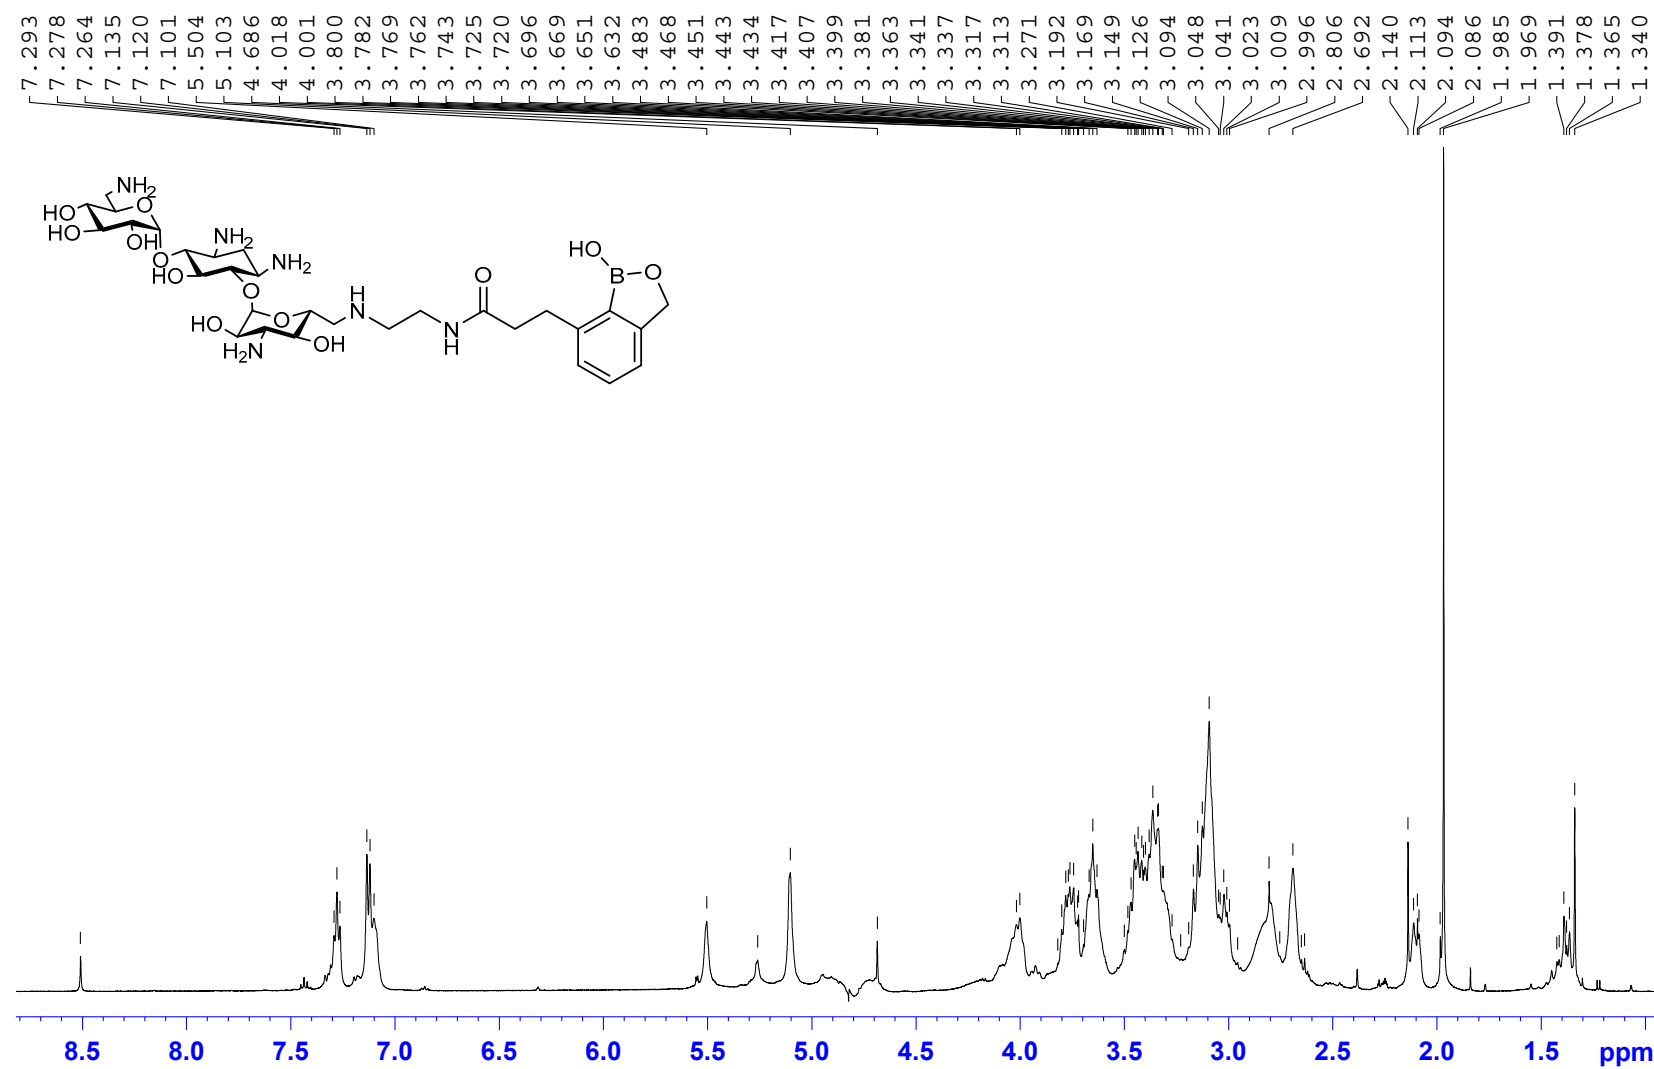

**Figure S25.** <sup>1</sup>H NMR (500.2 MHz, D<sub>2</sub>O) spectrum of 6''-(2-(3-(1-hydroxy-1,3-dihydrobenzo[c][1,2]oxaborol-7-yl)-N-(ethyl-1-amino)propanamide)-6''-deoxykanamycin A (10)

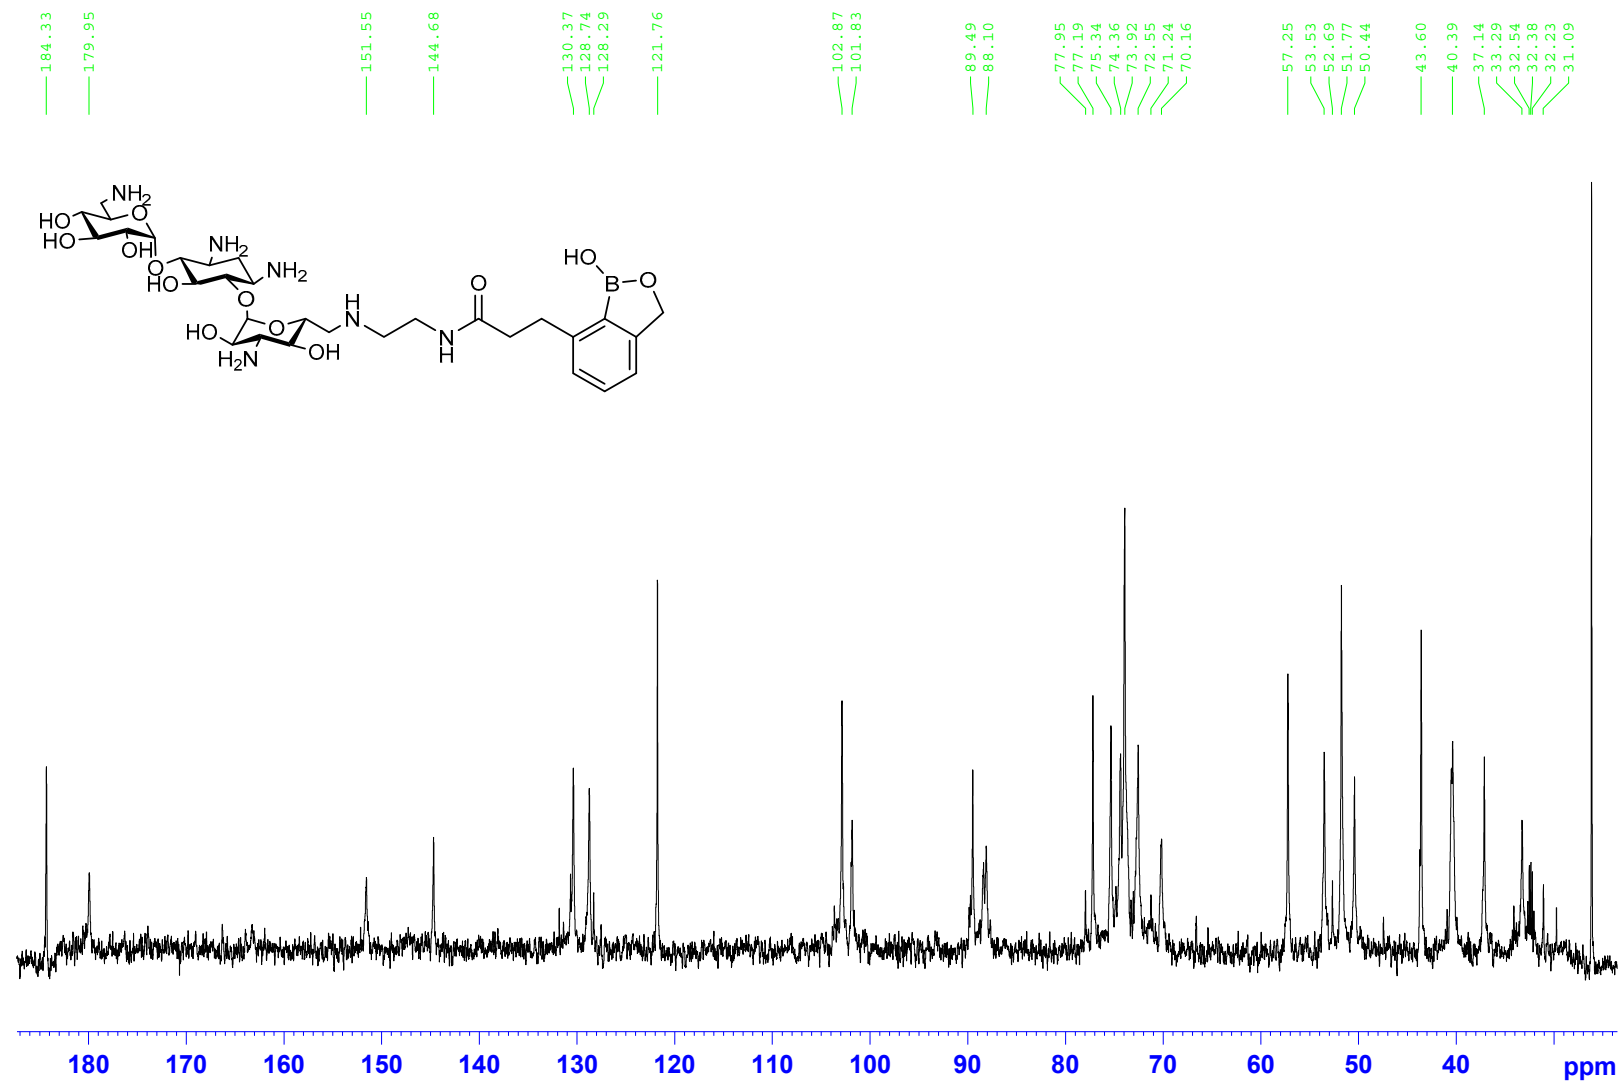

**Figure S26.** <sup>13</sup>C NMR (125.8 MHz, D<sub>2</sub>O) spectrum of 6''-(2-(3-(1-hydroxy-1,3-dihydrobenzo[c][1,2]oxaborol-7-yl)-N-(ethyl-1-amino)propanamide)-6''-deoxykanamycin A (10)

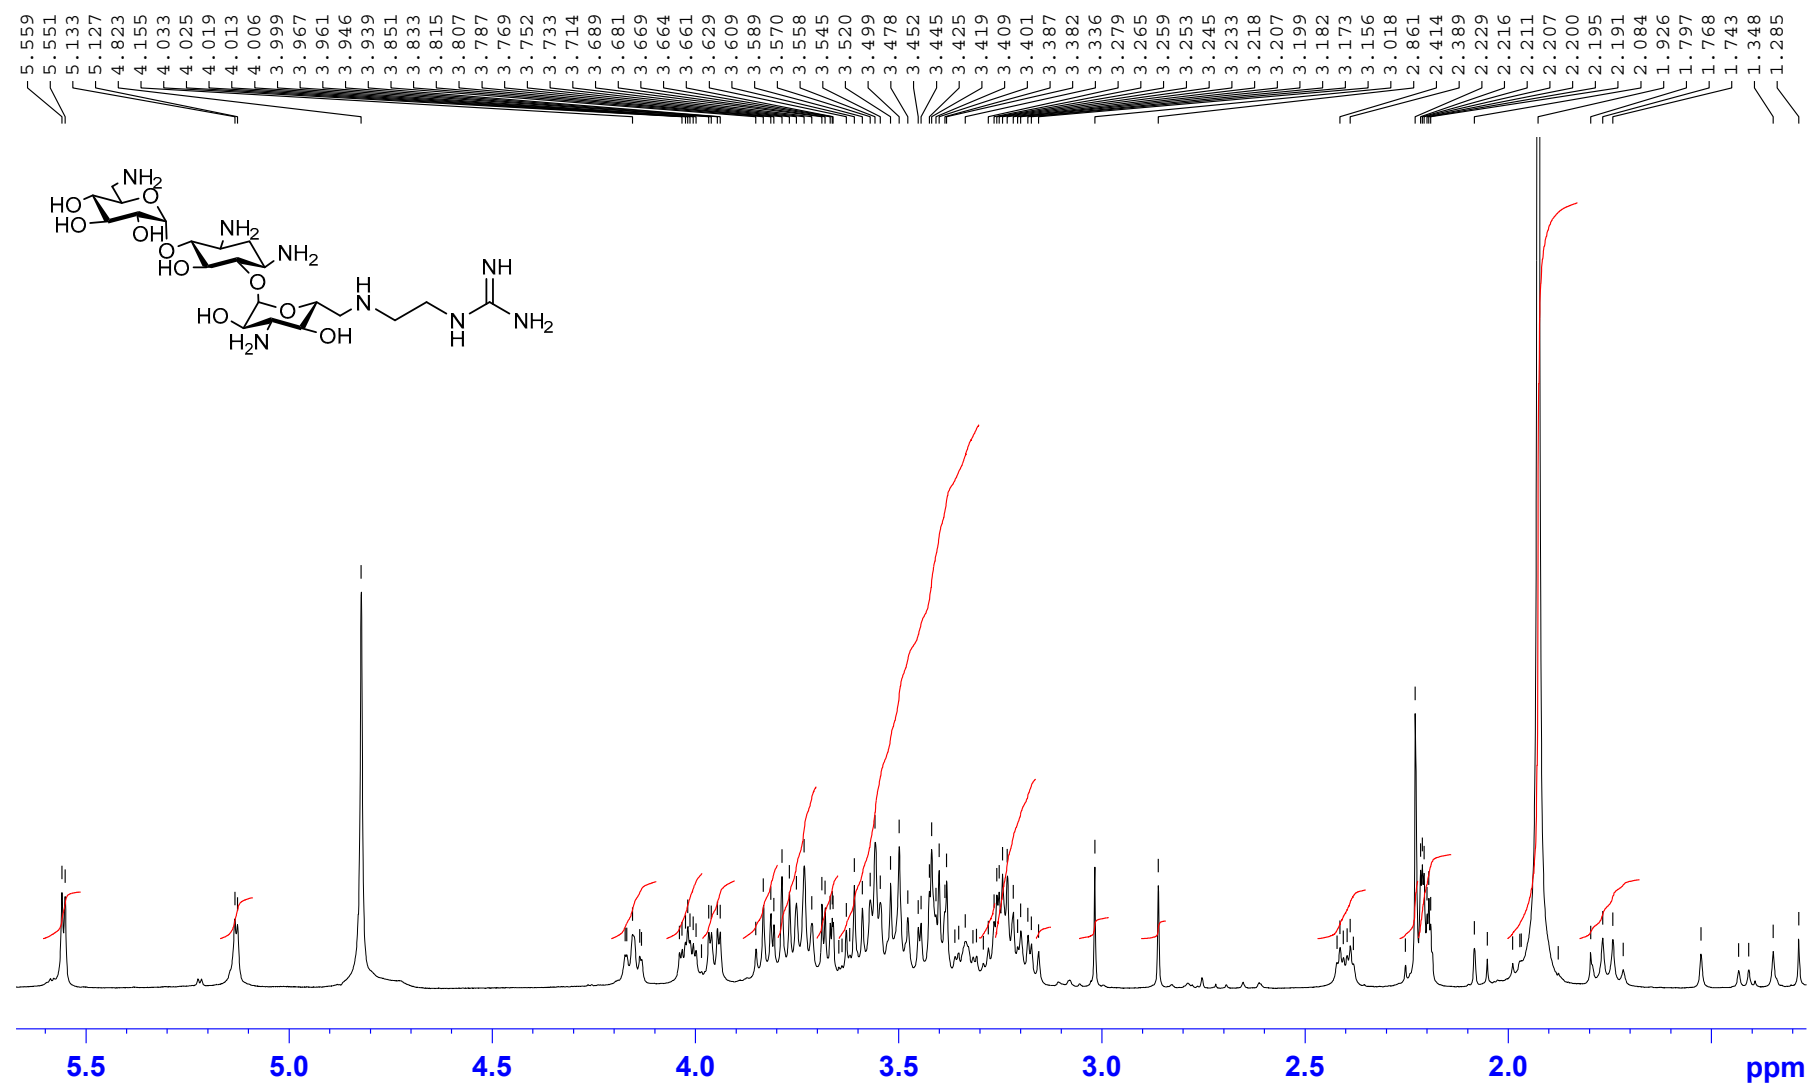

**Figure S27.** <sup>1</sup>H NMR (500.2 MHz, D<sub>2</sub>O) spectrum of 6''-(2-aminoguanidinoethyl-1-amino)-6''-deoxykanamycin A (11)

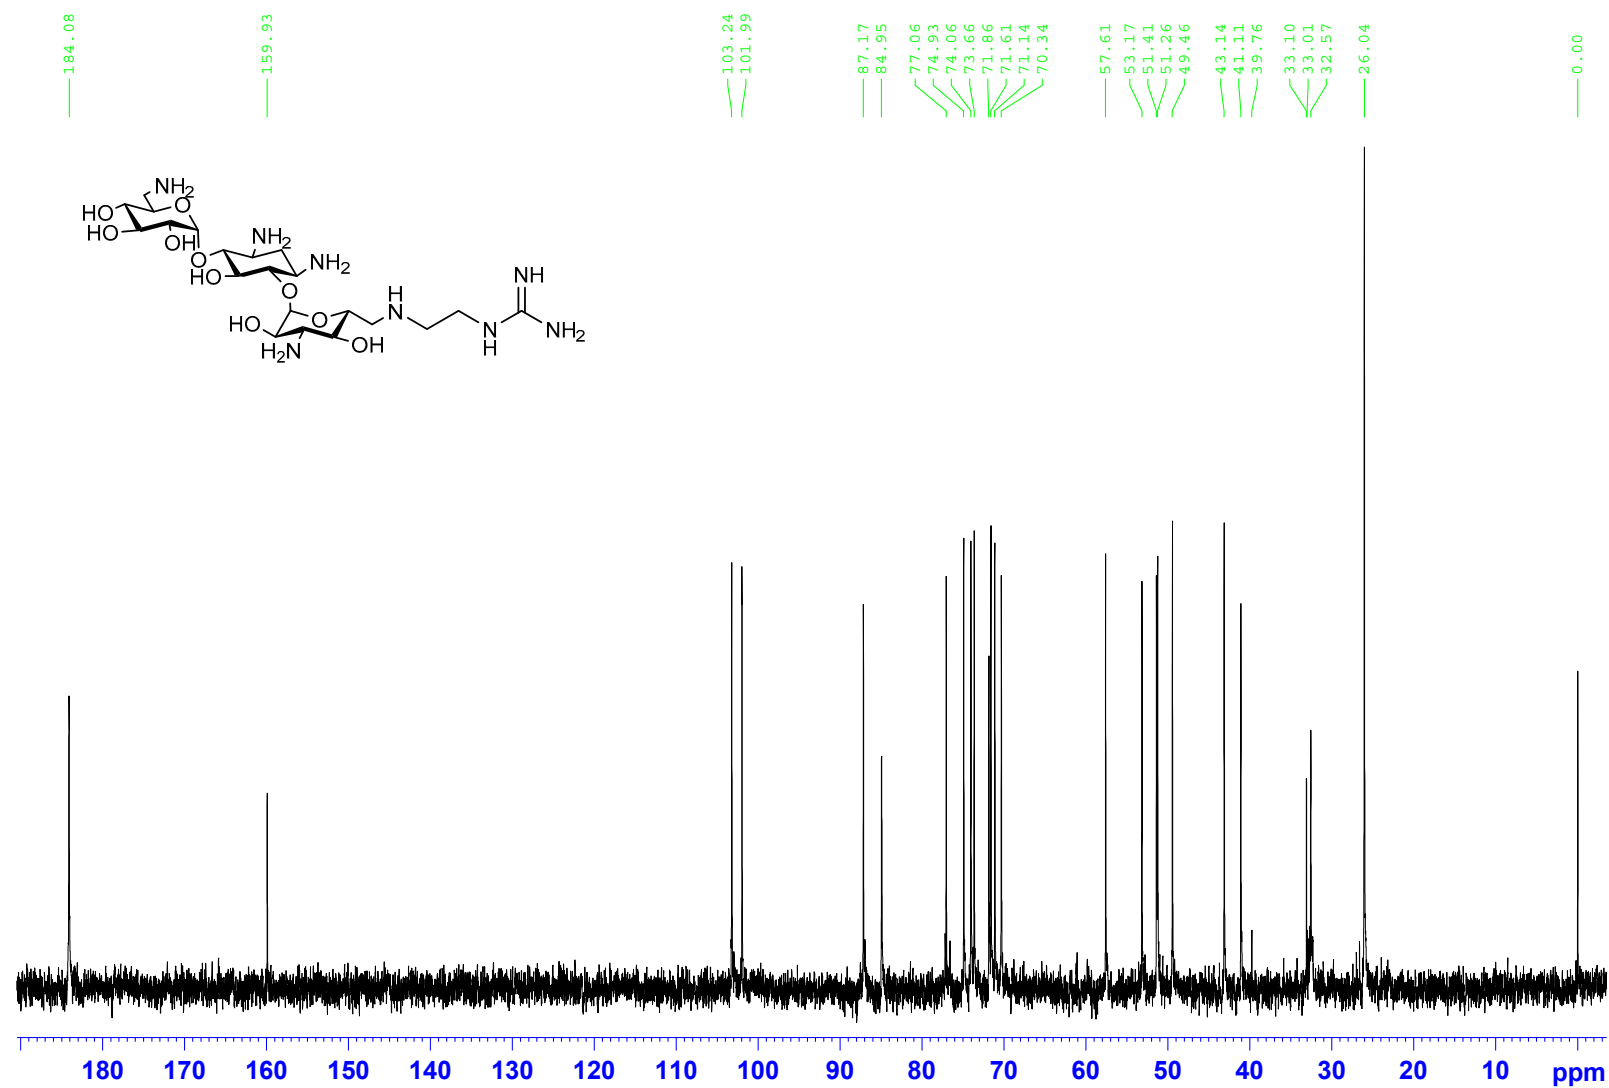

**Figure S28.** <sup>13</sup>C NMR (125.8 MHz, D<sub>2</sub>O) spectrum of 6''-(2-aminoguanidinoethyl-1-amino)-6''-deoxykanamycin A (11)

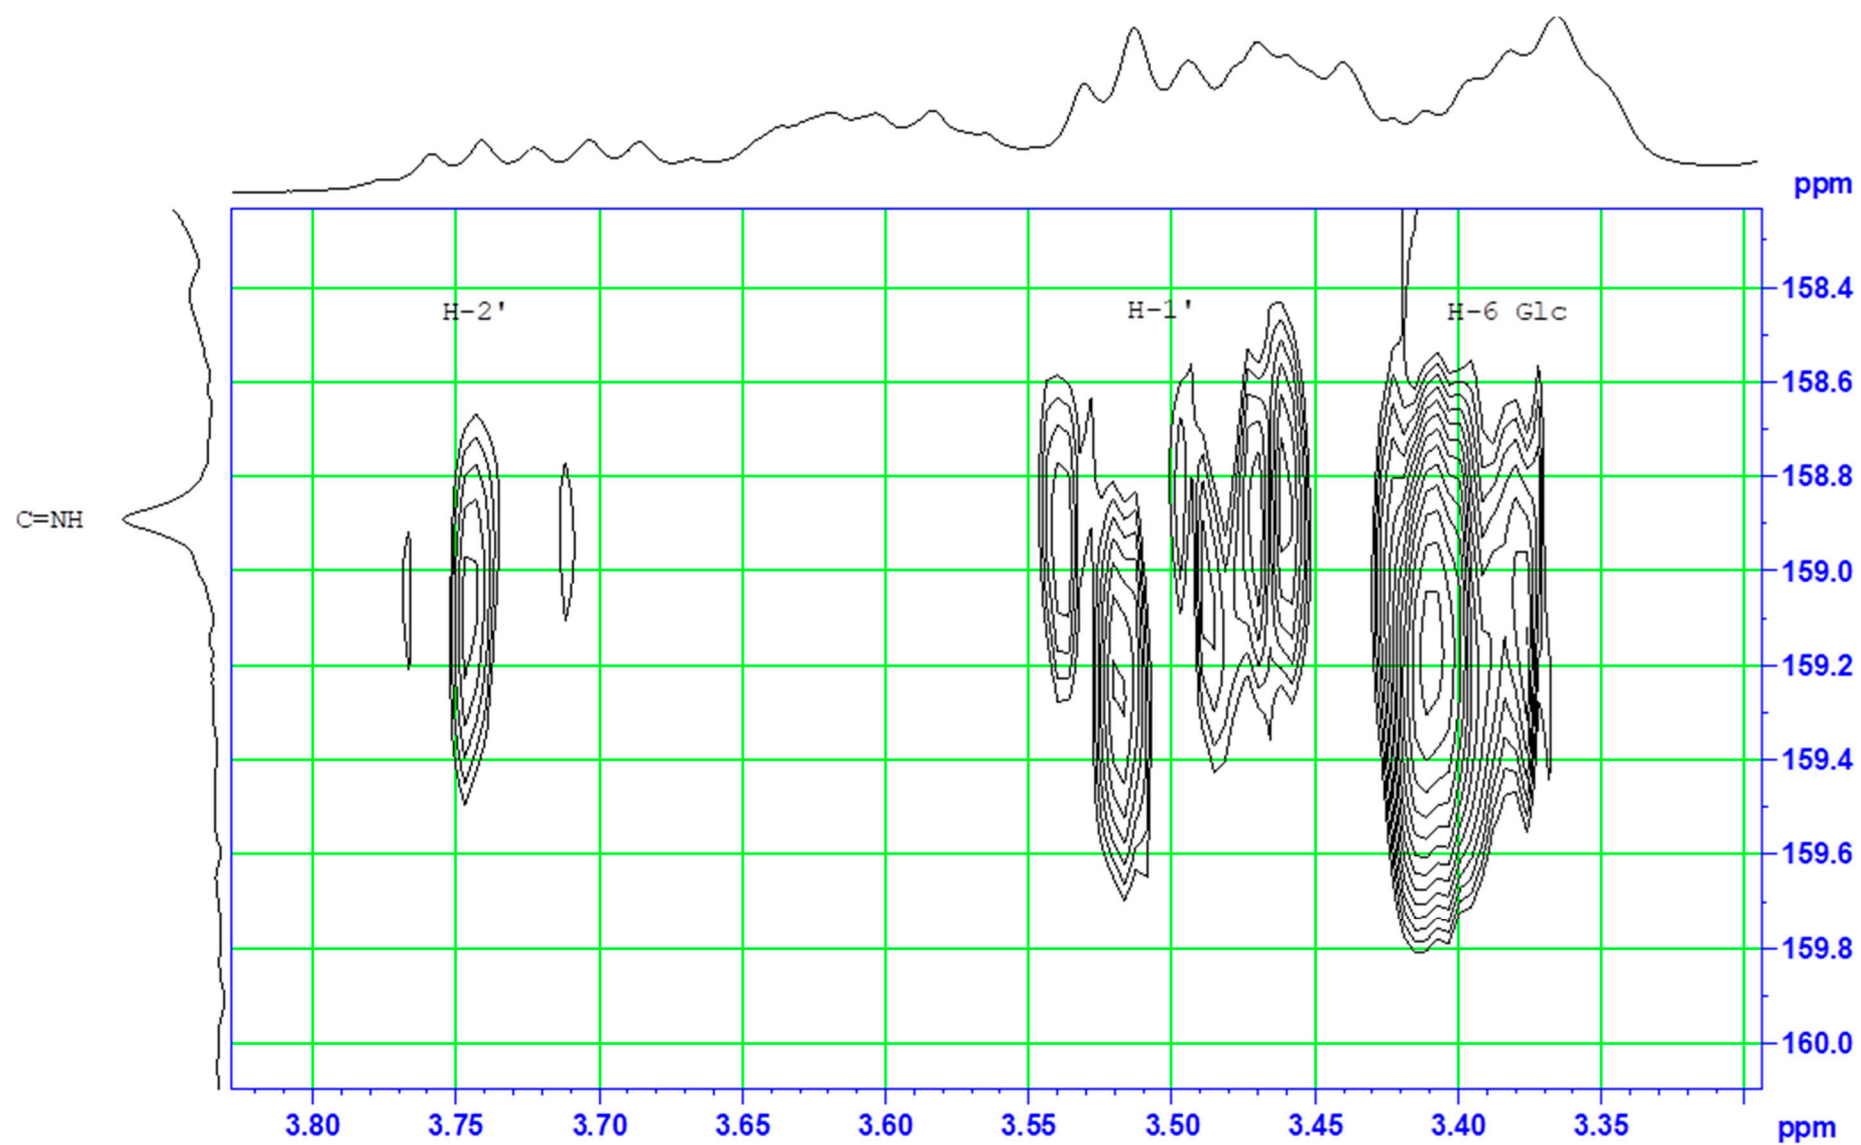

**Figure S29.** Fragment of the HMBC  $^1\text{H}$ - $^{13}\text{C}$  spectrum of compound 12.



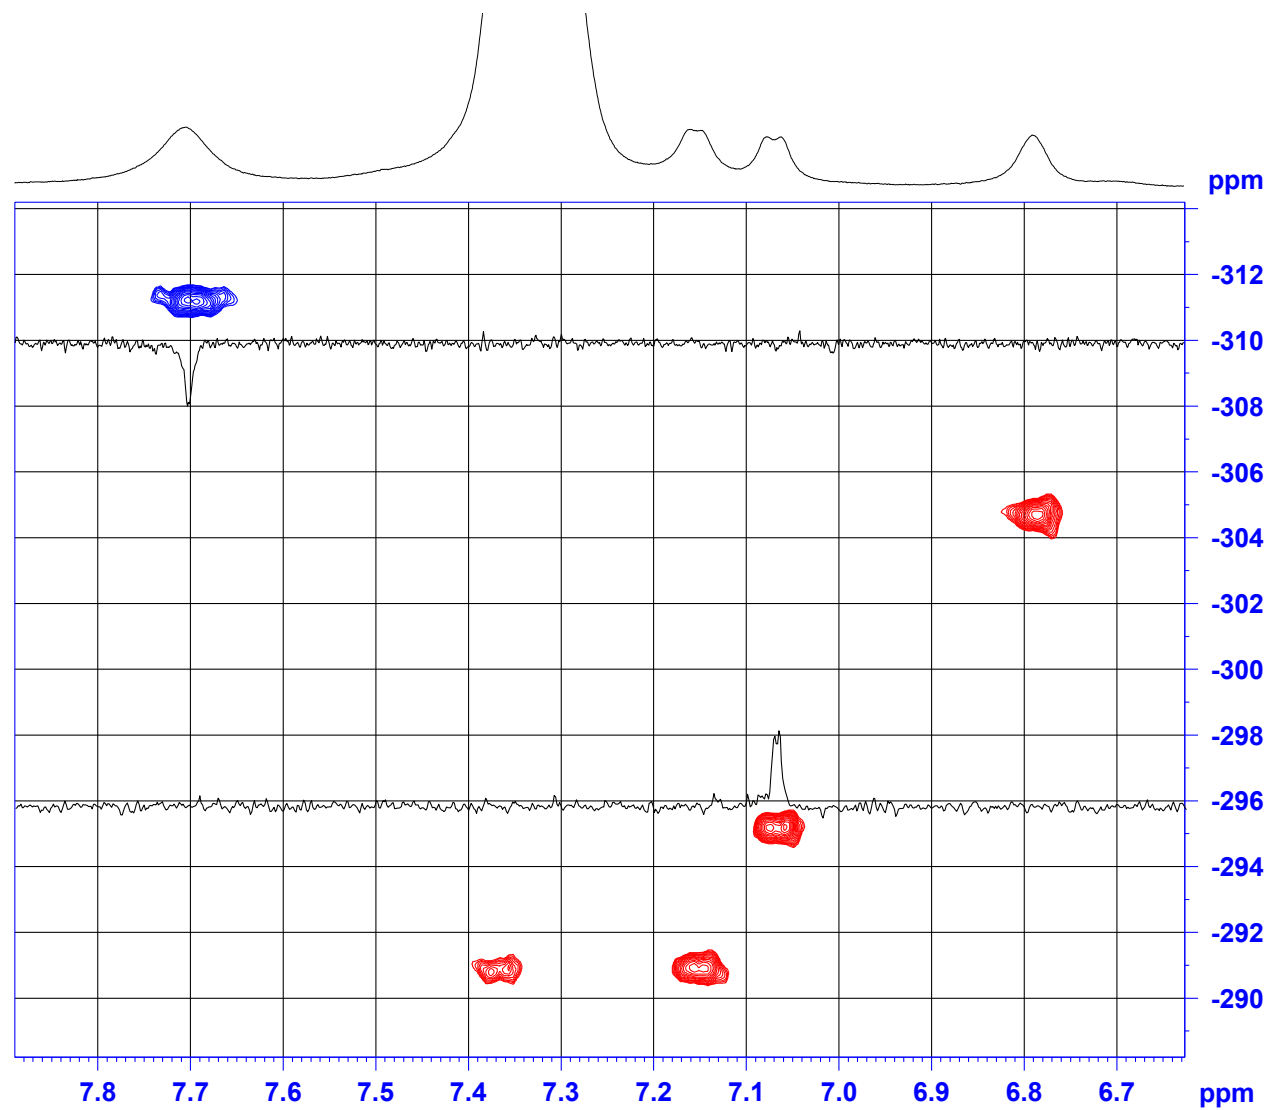

**Figure S30.**  $^1\text{H}$ - $^{15}\text{N}$  edHSQC spectrum of compound **12**. Insets show cross sections of the two-dimensional spectrum through the corresponding signals. The signal of the  $\text{NH}_2$  group at -311.2 ppm has negative polarity.

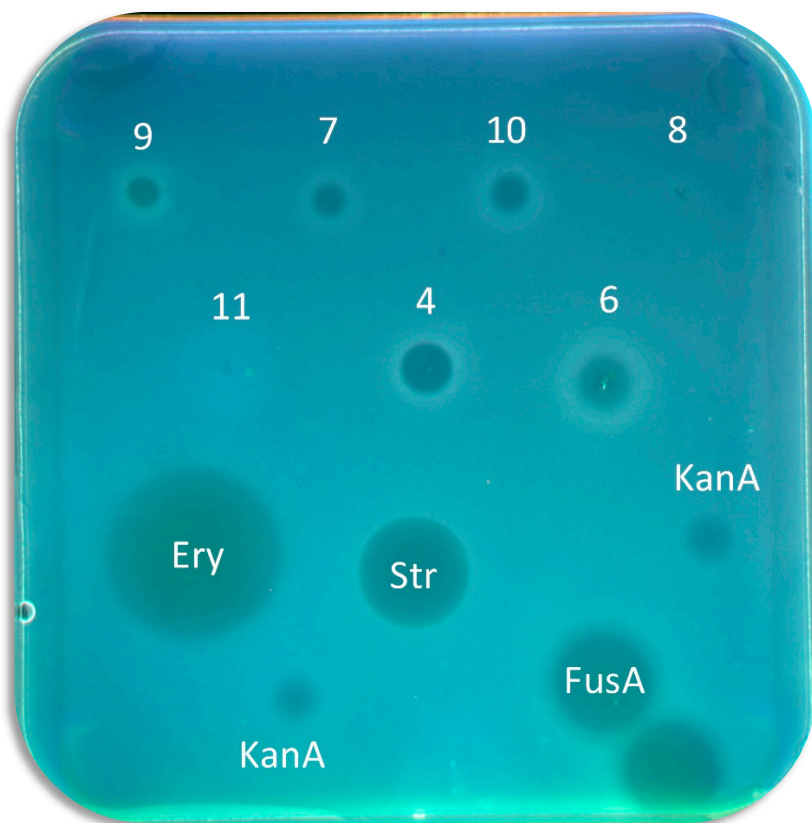

(a)

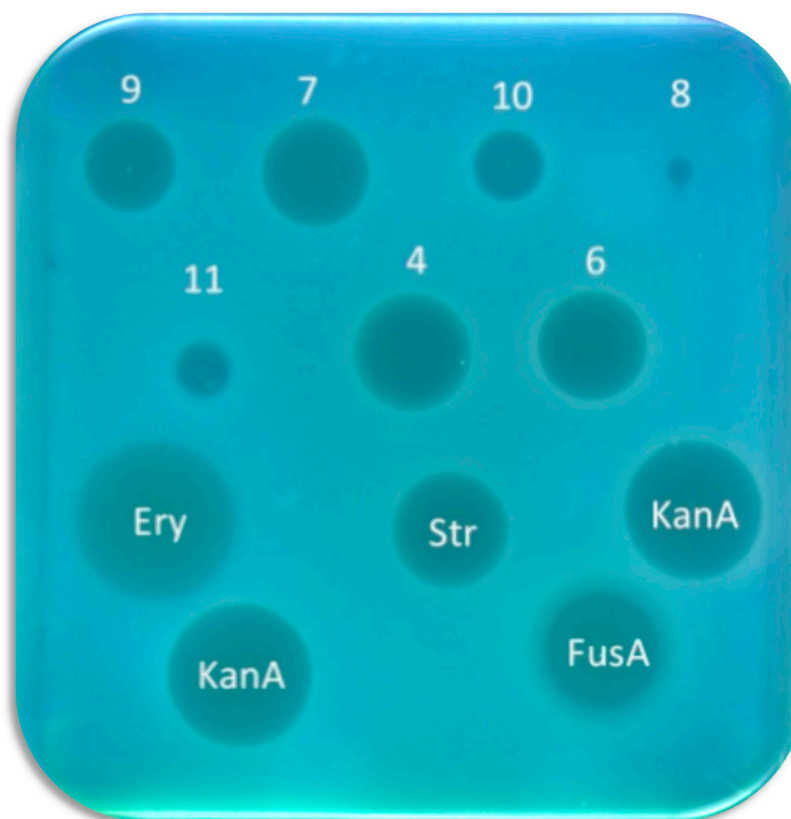

(b)

**Figure S31.** The antibacterial activity of the kanamycin A derivatives **4**, **6–11** and reference antibiotics (KanA – Kanamycin A; Ery – Erythromycin; Str – Streptomycin; FusA – Fusidic acid) against *E. coli* BW25113 (the diffusion in agar method): **a)** resistant strain bearing aminoglycoside-3'-phosphotransferase gene; **b)** wild type strain *E. coli*. Concentration of each antibiotic 50 mg/ml, volume of droplet – 1  $\mu$ l.
